# Supplementary material for: Does integument arise de novo or from pre-existing structures? ── Insights from the key regulatory genes controlling integument development
Source: Front Plant Sci. 2023 Jan 13;13:1078248. doi: 10.3389/fpls.2022.1078248 (PMC9880897; doi:10.3389/fpls.2022.1078248)
Supplement: Supplementary Table 2 — List of sequences included in the phylogenetic analyses for the ANT, CUC, BEL1, SPL, C3HDZ, YABBY, KANADI, and ARF gene families, respectively. Species name, gene name, and the accession numbers are included. [file Table_2.xlsx]

## Sheet: ANT
Species	Name	Accession number	Group
Arabidopsis thaliana	AtANT	AT4G37750	euANT
	AtAIL1	AT1G72570	euANT
	AtAIL2	AT5G17430	euANT
	AtAIL3	AT3G20840	euANT
	AtAIL4	AT1G51190	euANT
	AtAIL5	AT5G57390	euANT
	AtAIL6	AT5G10510	euANT
	AtAIL7	AT5G65510	euANT
	AtAP2	AT4G36920	euAP2
	AtSMZ	AT3G54990	euAP2
	AtSNZ	AT2G39250	euAP2
	AtTOE1	AT2G28550	euAP2
	AtTOE2	AT5G60120	euAP2
	AtTOE3	AT5G67180	euAP2
	AtWRI1	AT3G54320	basalANT
	AtWRI3	AT1G16060	basalANT
	AtWRI4	AT1G79700	basalANT
	AtERF	AT2G41710	basalANT
Abies alba	AalANT	AALBA5B925909P1	euANT
	AalAIL5	AALBA5B225310P1	euANT
	AalAIL2_6A	AALBA5B352655P1	euANT
	AalWRI1	AALBA5B1073687P1	basalANT
	AalWRI4	AALBA5B236472P2	basalANT
Anthoceros angustus	AanAIL2_6A	AANG012380	euANT
	AanERF1	AANG002772	basalANT
	AanERF2	AANG004260	basalANT
Amborella trichopoda	AtrAIL1	ATR0598G064	euANT
	AtrAIL2	ATR0743G041	euANT
	AtrAIL3	ATR0605G302	euANT
	AtrAIL5	ATR0580G096	euANT
	AtrANT	ATR0739G123	euANT
	AtrERF1	ATR0188G014	basalANT
	AtrWRI1	ATR0307G111	basalANT
	AtrWRI3	ATR0580G389	basalANT
Azolla filiculoides	AfiAIL2_6A	Azfi_s0033.g025087	euANT
	AfiAIL2_6B	Azfi_s0619.g079558	euANT
	AfiAIL2_6C	Azfi_s0008.g011313	euANT
	AfiANT1	Azfi_s0006.g010452	euANT
	AfiANT2	Azfi_s0059.g034553	euANT
	AfiANT3	Azfi_s0072.g037000	euANT
	AfiWRI1_3A	Azfi_s0207.g057931	basalANT
Brachypodium distachyon	BdiAIL1	Bradi1g72890	euANT
	BdiAIL2A	Bradi3g48697	euANT
	BdiAIL2B	Bradi5g14960	euANT
	BdiAIL2C	Bradi2g57747	euANT
	BdiAIL2D	Bradi1g31337	euANT
	BdiAIL5	Bradi5g24360	euANT
	BdiANT1	Bradi1g69209	euANT
	BdiANT2	Bradi1g07290	euANT
	BdiANT3	Bradi1g57560	euANT
	BdiERF	Bradi2g26987	basalANT
	BdiWRI1	Bradi4g43877	basalANT
	BdiWRI3	Bradi3g36820	basalANT
	BdiWRI4	Bradi4g30617	basalANT
Beta vulgaris	BvuAIL1	Bv7_170060_euhj	euANT
	BvuAIL2	Bv4_074790_jcpm	euANT
	BvuAIL3	Bv4_072290_pyiq	euANT
	BvuAIL5	Bv8_198510_ekky	euANT
	BvuAIL6	Bv6_133850_kaqk	euANT
	BvuANT1	Bv1_014630_qaoe	euANT
	BvuANT2	Bv6_128480_kgcj	euANT
	BvuWRI1	Bv4_096070_gpem	basalANT
	BvuWRI3	Bv8_191760_rhxh	basalANT
Coffea canephora	CcaAIL1	Cc04_g01350	euANT
	CcaAIL2	Cc09_g04020	euANT
	CcaAIL3	Cc00_g13130	euANT
	CcaAIL5	Cc06_g13190	euANT
	CcaAIL6	Cc07_g14010	euANT
	CcaANT1	Cc07_g07390	euANT
	CcaANT2	Cc10_g07690	euANT
	CcaWRI1	Cc07_g21360	basalANT
	CcaWRI3	Cc04_g05340	basalANT
	CcaWRI4	Cc06_g14450	basalANT
Ceratopteris richardii	CriAIL2_6A	Ceric.03G029300	euANT
	CriAIL2_6B	Ceric.10G056100	euANT
	CriAIL2_6C	Ceric.10G056200	euANT
	CriAIL2_6D	Ceric.15G054600	euANT
	CriAIL2_6E	Ceric.26G003300	euANT
	CriAIL2_6F	Ceric.32G008600	euANT
	CriANT1	Ceric.12G002600	euANT
	CriANT2	Ceric.31G036600	euANT
	CriERF	Ceric.14G085600	basalANT
	CriWRI1_3A	Ceric.03G054600	basalANT
Ceratodon purpureus	CpuAIL2_6A	CepurGG1.10G178800	euANT
	CpuAIL2_6B	CepurGG1.7G113800	euANT
	CpuERF1	CepurGG1.8G091800	basalANT
	CpuERF2	CepurGG1.12G118400	basalANT
	CpuWRI1_3A	CepurGG1.12G011300	basalANT
	CpuWRI1_3B	CepurGG1.1G184300	basalANT
	CpuWRI1_3C	CepurGG1.3G236900	basalANT
	CpuWRI1_3D	CepurGG1.4G087400	basalANT
Chlamydomonas reinhardtii	CreeuAP2A	Cre01.g009575	euAP2
	CreeuAP2B	Cre01.g009650	euAP2
	CreeuAP2C	Cre10.g441300	euAP2
	CrepreANT1	Cre16.g667900	preANT
Chlorokybus atmophyticus	CateuAP2	Chrsp66S07202	euAP2
Cycas micholitzii	CmiERF	scaffold-XZUY-2013289-Cycas_micholitzii	basalANT
Euryale ferox	EfeAIL1A	g03475.t1	euANT
	EfeAIL1B	g05992.t1	euANT
	EfeAIL1C	g26132.t1	euANT
	EfeAIL2A	g04716.t1	euANT
	EfeAIL2B	g11688.t1	euANT
	EfeAIL2C	g27229.t1	euANT
	EfeAIL5A	g14409.t1	euANT
	EfeAIL5B	g30915.t1	euANT
	EfeAIL6B	g04544.t1	euANT
	EfeAIL6C	g17120.t1	euANT
	EfeAIL6D	g30614.t1	euANT
	EfeANT1	g11455.t1	euANT
	EfeANT2	g35113.t1	euANT
	EfeANT3	g04337.t1	euANT
	EfeERF1	g05005.t1	basalANT
	EfeERF2	g11834.t1	basalANT
	EfeWRI1A	g28685.t1	basalANT
	EfeWRI1B	g29588.t1	basalANT
	EfeWRI1C	g31851.t1	basalANT
	EfeWRI3A	g04150.t1	basalANT
	EfeWRI3B	g11252.t1	basalANT
	EfeWRI4	g29958.t1	basalANT
Fragaria vesca	FveAIL1	FVE07424	euANT
	FveAIL2	FVE21524	euANT
	FveAIL3	FVE20607	euANT
	FveAIL6	FVE20828	euANT
	FveANT1	FVE02623	euANT
	FveANT2	FVE05644	euANT
	FveERF	FVE02470	basalANT
	FveWRI1	FVE00377	basalANT
	FveWRI3	FVE15913	basalANT
	FveWRI4	FVE27659	basalANT
Ginkgo biloba	GbiAIL5A	Gb_18560	euANT
	GbiAIL5B	Gb_24420	euANT
	GbiANT1	Gb_05487	euANT
	GbiANT2	Gb_07049	euANT
	GbiANT3	Gb_40268	euANT
	GbiERF	Gb_19663	basalANT
	GbiWRI1A	Gb_11937	basalANT
	GbiWRI1B	Gb_18139	basalANT
	GbiWRI1C	Gb_39931	basalANT
Gnetum montanum	GmoAIL5A	TnS000286277t01	euANT
	GmoAIL5B	TnS000821471t15	euANT
	GmoANT1	TnS000913013t01	euANT
	GmoANT2	TnS000837467t01	euANT
	GmoERF	TnS000827737t05	basalANT
	GmoWRI1	TnS000036863t04	basalANT
Glycine max	GmaAIL1A	Glyma.16G007400	euANT
	GmaAIL1B	Glyma.07G038200	euANT
	GmaAIL2A	Glyma.09G248200	euANT
	GmaAIL2B	Glyma.10G171400	euANT
	GmaAIL2C	Glyma.18G244600	euANT
	GmaAIL3A	Glyma.11G131900	euANT
	GmaAIL3B	Glyma.12G056300	euANT
	GmaAIL5A	Glyma.13G096900	euANT
	GmaAIL5B	Glyma.17G062600	euANT
	GmaAIL6	Glyma.01G022500	euANT
	GmaAIL7A	Glyma.09G199800	euANT
	GmaAIL7B	Glyma.18G148000	euANT
	GmaAIL7C	Glyma.08G279000	euANT
	GmaANT1	Glyma.01G195900	euANT
	GmaANT2	Glyma.04G047900	euANT
	GmaANT3	Glyma.05G108600	euANT
	GmaANT4	Glyma.06G049200	euANT
	GmaANT5	Glyma.11G045800	euANT
	GmaANT6	Glyma.14G089200	euANT
	GmaANT7	Glyma.17G158300	euANT
	GmaANT8	Glyma.U037700	euANT
	GmaERF1	Glyma.02G185200	basalANT
	GmaERF2	Glyma.03G136100	basalANT
	GmaERF7	Glyma.19G138000	basalANT
	GmaWRI1A	Glyma.08G227700	basalANT
	GmaWRI1B	Glyma.15G221600	basalANT
	GmaWRI3A	Glyma.07G021000	basalANT
	GmaWRI3B	Glyma.08G220800	basalANT
	GmaWRI4A	Glyma.02G207100	basalANT
	GmaWRI4B	Glyma.04G154900	basalANT
	GmaWRI4C	Glyma.06G225200	basalANT
	GmaWRI4D	Glyma.17G070800	basalANT
Marchantia polymorpha	MpoAIL2_6A	Mapoly0008s0071	euANT
	MpoERF	Mapoly0009s0013	basalANT
Micromonas pusilla	MpupreANT1	52220	preANT
	MpueuAP2	58247	euAP2
Nelumbo nucifera	NnuAIL1	NNU.05104	euANT
	NnuAIL2	NNU.20865	euANT
	NnuAIL3	NNU.02805	euANT
	NnuAIL4	NNU.08332	euANT
	NnuAIL5	NNU.14749	euANT
	NnuAIL6	NNU.05192	euANT
	NnuAIL7	NNU.12870	euANT
	NnuANT1	NNU.13819	euANT
	NnuANT2	NNU.25658	euANT
	NnuERF	NNU.01815	basalANT
	NnuWRI1	NNU.10771	basalANT
	NnuWRI3	NNU.21756	basalANT
	NnuWRI4	NNU.25830	basalANT
Oryza sativa	OsaAIL1	LOC_Os03g07940	euANT
	OsaAIL2A	LOC_Os01g67410	euANT
	OsaAIL2B	LOC_Os02g40070	euANT
	OsaAIL2C	LOC_Os04g42570	euANT
	OsaAIL2D	LOC_Os11g19060	euANT
	OsaAIL2E	LOC_Os06g44750	euANT
	OsaAIL5	LOC_Os04g55970	euANT
	OsaANT1	LOC_Os07g03250	euANT
	OsaANT2	LOC_Os03g56050	euANT
	OsaERF	LOC_Os05g32270	basalANT
	OsaWRI1	LOC_Os12g03290	basalANT
	OsaWRI3	LOC_Os08g34360	basalANT
Physcomitrella patens	PpaAIL2_6A	Pp3c15_24790	euANT
	PpaAIL2_6B	Pp3c15_24980	euANT
	PpaAIL2_6C	Pp3c9_25400	euANT
	PpaAIL2_6D	Pp3c9_25570	euANT
	PpaERF1	Pp3c18_3900	basalANT
	PpaERF2	Pp3c5_2780	basalANT
	PpaERF3	Pp3c6_21840	basalANT
	PpaWRI1_3A	Pp3c12_12460	basalANT
	PpaWRI1_3B	Pp3c10_24550	basalANT
	PpaWRI1_3C	Pp3c23_13360	basalANT
Picea abies	PabAIL5	PAB00058541	euANT
	PabANT1	PAB00020446	euANT
	PabANT2	PAB00065438	euANT
	PabERF1	PAB00050696	basalANT
	PabERF2	PAB00053875	basalANT
	PabWRI1	PAB00036560	basalANT
	PabWRI4	PAB00064156	basalANT
Populus trichocarpa	PtrAIL1A	Potri.003G064700	euANT
	PtrAIL1B	Potri.001G169500	euANT
	PtrAIL2A	Potri.008G076400	euANT
	PtrAIL2B	Potri.010G181000	euANT
	PtrAIL3	Potri.001G018400	euANT
	PtrAIL4	Potri.003G205700	euANT
	PtrAIL5A	Potri.006G167700	euANT
	PtrAIL5B	Potri.018G091600	euANT
	PtrAIL6	Potri.007G011600	euANT
	PtrANT1	Potri.002G114800	euANT
	PtrANT2	Potri.005G148400	euANT
	PtrANT3	Potri.007G007400	euANT
	PtrANT4	Potri.014G012200	euANT
	PtrERF1	Potri.006G049700	basalANT
	PtrERF2	Potri.016G056400	basalANT
	PtrWRI1A	Potri.008G011900	basalANT
	PtrWRI1B	Potri.010G247200	basalANT
	PtrWRI3A	Potri.001G041500	basalANT
	PtrWRI3B	Potri.003G185300	basalANT
	PtrWRI4A	Potri.006G179900	basalANT
	PtrWRI4B	Potri.018G102200	basalANT
Pseudotsuga menziesii	PmeAIL2_6A	PME00112031	euANT
	PmeAIL5	PME00123987	euANT
	PmeANT1	PME00021686	euANT
	PmeANT2	PME00019482	euANT
	PmeERF1	PME00043911	basalANT
	PmeERF2	PME00099754	basalANT
	PmeWRI1A	PME00107131	basalANT
	PmeWRI1B	PME00101759	basalANT
	PmeWRI3	PME00099745	basalANT
Picea glauca	PglANT	PGL00027224	euANT
	PglAIL5	PGL00025861	euANT
	PglWRI1	PGL00011161	basalANT
Pinus pinaster	PpiAIL2_6A	PPI00042898	euANT
	PpiAIL5A	PPI00051957	euANT
	PpiAIL5B	PPI00011905	euANT
	PpiANT1	PPI00011834	euANT
	PpiANT2	PPI00013750	euANT
	PpiERF	PPI00058389	basalANT
	PpiWRI1A	PPI00064131	basalANT
	PsiWRI1B	PSI00009383	basalANT
Pinus sylvestris	PsyAIL2_6A	PSY00016492	euANT
	PsyAIL5A	PSY00009818	euANT
	PsyAIL5B	PSY00009024	euANT
	PsyANT1	PSY00018194	euANT
	PsyANT2	PSY00022603	euANT
	PsyERF	PSY00020579	basalANT
	PsyWRI1	PSY00019224	basalANT
	PsyWRI3	PSY00029144	basalANT
Pinus taeda	PtaANT	PTA00026236	euANT
	PtaAIL5	PTA00004564	euANT
	PtaWRI1	PTA00019253	basalANT
	PtaERF	PTA00053573	basalANT
Selaginella moellendorffii	SmoAIL2_6A	gene22893	euANT
	SmoAIL2_6B	gene13219	euANT
	SmoERF1	gene19852	basalANT
	SmoERF2	gene32110	basalANT
	SmoERF3	gene19852	basalANT
Salvinia cucullata	ScuAIL2_6A	Sacu_v1.1_s0055.g014417	euANT
	ScuANT1	Sacu_v1.1_s0020.g008088	euANT
	ScuANT2	Sacu_v1.1_s0004.g002296	euANT
	ScuANT3	Sacu_v1.1_s0039.g012165	euANT
	ScuERF	Sacu_v1.1_s0084.g018230	basalANT
Sequoiadendron giganteum	SgiAIL5A	SEGI_07168	euANT
	SgiAIL5B	SEGI_08210	euANT
	SgiANT	SEGI_27367	euANT
	SgiWRI1A	SEGI_08643	basalANT
	SgiWRI1B	SEGI_24788	basalANT
	SgiWRI1C	SEGI_31329	basalANT
	SgiWRI1D	SEGI_19630	basalANT
	SgiWRI4	SEGI_23662	basalANT
Solanum lycopersicum	SlyAIL1	Solyc03g123430	euANT
	SlyAIL2	Solyc11g008560	euANT
	SlyAIL3	Solyc11g061750	euANT
	SlyAIL5	Solyc07g018290	euANT
	SlyAIL6	Solyc05g051380	euANT
	SlyAIL7	Solyc11g010710	euANT
	SlyANT1	Solyc02g092050	euANT
	SlyANT2	Solyc04g077490	euANT
	SlyERF	Solyc02g030210	basalANT
	SlyWRI1	Solyc01g096860	basalANT
	SlyWRI3A	Solyc03g117720	basalANT
	SlyWRI3B	Solyc06g068570	basalANT
	SlyWRI4	Solyc12g010490	basalANT
Sphagnum fallax	SfaAIL2_6A	Sphfalx01G020000	euANT
	SfaAIL2_6B	Sphfalx01G159700	euANT
	SfaAIL2_6C	Sphfalx02G190900	euANT
	SfaAIL2_6D	Sphfalx05G009300	euANT
	SfaERF	Sphfalx04G065400	basalANT
	SfaWRI1_3A	Sphfalx16G028300	basalANT
	SfaWRI1_3B	Sphfalx19G040500	basalANT
Thuja plicata	TplAIL5A	Thupl.29379116s0020	euANT
	TplAIL5B	Thupl.29379116s0021	euANT
	TplAIL5C	Thupl.29379116s0022	euANT
	TplAIL5D	Thupl.29380719s0002	euANT
	TplAIL5E	Thupl.29382008s0015	euANT
	TplANT1	Thupl.29377983s0006	euANT
	TplANT2	Thupl.29381970s0006	euANT
	TplERF	Thupl.29378451s0006	basalANT
	TplWRI1A	Thupl.29382329s0021	basalANT
	TplWRI1B	Thupl.29382329s0022	basalANT
	TplWRI1C	Thupl.29382329s0023	basalANT
	TplWRI1D	Thupl.29382329s0024	basalANT
	TplWRI1E	Thupl.29379440s0010	basalANT
	TplWRI3	Thupl.29350804s0001	basalANT
Taxus baccata	TbaANT	TBA00019028	euANT
	TbaERF	TBA00031556	basalANT
Vitis vinifera	VviAIL1	GSVIVG01016764001	euANT
	VviAIL2A	GSVIVG01019049001	euANT
	VviAIL2B	GSVIVT01019047001	euANT
	VviAIL4	GSVIVG01025307001	euANT
	VviAIL5	GSVIVG01029219001	euANT
	VviAIL6	GSVIVG01002536001	euANT
	VviAIL7	GSVIVG01004382001	euANT
	VviANT1	GSVIVG01007388001	euANT
	VviANT3	GSVIVT01009293001	euANT
	VviERF	GSVIVG01033273001	basalANT
	VviWRI1	GSVIVG01027345001	basalANT
	VviWRI3	GSVIVG01016097001	basalANT
	VviWRI4	GSVIVG01023697001	basalANT
Welwitschia mirabilis	WmiAIL5A	W.mirabilis.02147	euANT
	WmiAIL5B	W.mirabilis.10075	euANT
	WmiANT1	W.mirabilis.16441	euANT
	WmiANT2	W.mirabilis.21613	euANT
	WmiERF	W.mirabilis.23441	basalANT
	WmiWRI1	W.mirabilis.26823	basalANT
Zea mays	ZmaAIL1	Zm00001d027878	euANT
	ZmaAIL2A	Zm00001d017207	euANT
	ZmaAIL2B	Zm00001d042492	euANT
	ZmaAIL2C	Zm00001d046913	euANT
	ZmaAIL5	Zm00001d002025	euANT
	ZmaANT1	Zm00001d007840	euANT
	ZmaANT2	Zm00001d018731	euANT
	ZmaANT3	Zm00001d034204	euANT
	ZmaANT4	Zm00001d048004	euANT
	ZmaWRI1A	Zm00001d005016	basalANT
	ZmaWRI1C	Zm00001d052405	basalANT
	ZmaWRI3	Zm00001d020540	basalANT
	ZmaWRI4	Zm00001d032144	basalANT

## Sheet: CUC
Species	Name	Accession number	Group
Arabidopsis thaliana	AtCUC1	AT3G15170	II
	AtCUC2	AT5G53950	II
	AtCUC3	AT1G76420	I
	AtNAC38	AT2G24430	III
	AtNAC58	AT3G18400	IV
	AtNAC46	AT3G04060	V
	AtNAC87	AT5G18270	V
	AtNAC3	AT3G29035	VI
	AtNAC79	AT5G07680	VI
	AtNAC6	AT5G39610	VI
	AtNAC100	AT5G61430	VI
Anthoceros angustus	AanCUC3	AANG004189	VII
Anthoceros agrestis	AagCUC1	AagrOXF_evm.model.utg000003l.287.1	VII
Anthoceros punctatus	ApuCUC1	Apun_evm.model.utg000098l.196.1	VII
Amborella trichopoda	AtrCUC2	ATR0730G026	II
	AtrCUC3	ATR0605G015	I
	AtrNAC3	ATR0564G508	VI
	AtrNAC38	ATR0626G215	III
	AtrNAC46	ATR0068G014	V
	AtrNAC58	ATR1125G010	IV
Azolla filiculoides	AfiCUC1	Azfi_s0008.g011556	VII
	AfiCUC2	Azfi_s0030.g024257	VII
	AfiCUC3	Azfi_s0061.g034971	VII
	AfiCUC4	Azfi_s0749.g085087	VII
Brachypodium distachyon	BdiNAC58	Bradi1g14467	IV
	BdiNAC46	Bradi1g17440	V
	BdiCUC1B	Bradi1g41712	II
	BdiNAC87	Bradi1g63630	V
	BdiCUC3	Bradi3g40085	I
	BdiNAC3	Bradi3g46900	VI
	BdiNAC38	Bradi4g34157	III
	BdiNAC79	Bradi5g12407	VI
Beta vulgaris	BvuCUC3	Bv1_014170_yzgr	I
	BvuCUC2	Bv4_086610_cugw	II
	BvuNAC58	Bv5_114130_gzxk	IV
	BvuNAC38	Bv2_035010_gcaa	III
	BvuNAC79	Bv5_114390_pjnp	VI
	BvuNAC3	Bv2_046950_hasi	VI
Ceratodon purpureus	CpuCUC1	CepurGG1.1G218100	VII
	CpuCUC2	CepurGG1.4G253800	VII
	CpuCUC3	CepurGG1.5G198500	VII
	CpuCUC4	CepurGG1.UG004000	VII
Coffea canephora	CcaNAC38	Cc00_g08040	III
	CcaCUC2	Cc05_g11720	I
	CcaNAC58	Cc04_g07090	IV
	CcaNAC79	Cc04_g16290	VI
	CcaNAC3	Cc07_g03570	VI
	CcaNAC46	Cc00_g08030	V
Ceratopteris richardii	CriCUC1	Ceric.35G028100	VII
	CriCUC2	Ceric.21G082500	VII
	CriCUC3	Ceric.12G030600	VII
	CriCUC4	Ceric.02G022900	VII
	CriCUC5	Ceric.06G022100	VII
Euryale ferox	EfeCUC1A	g00606.t1	II
	EfeCUC1B	g01965.t1	II
	EfeCUC1C	g27810.t1	II
	EfeCUC2A	g02837.t1	II
	EfeCUC2B	g30390.t1	II
	EfeCUC2C	g34586.t1	II
	EfeCUC3A	g02115.t1	I
	EfeCUC3B	g35960.t1	I
	EfeNAC38A	g16677.t1	III
	EfeNAC38B	g21989.t1	III
	EfeNAC38C	g39366.t1	III
	EfeNAC38D	g39898.t1	III
	EfeNAC46A	g06700.t1	V
	EfeNAC46B	g37892.t1	V
	EfeNAC58A	g04955.t1	IV
	EfeNAC58B	g10856.t1	IV
	EfeNAC58C	g39777.t1	IV
Fragaria vesca	FveCUC2A	FVE00971	II
	FveCUC2B	FVE22522	II
	FveCUC2C	FVE30749	II
	FveCUC3	FVE31474	I
	FveNAC3	FVE04424	VI
	FveNAC38	FVE08765	III
	FveNAC46	FVE20686	V
	FveNAC58	FVE25163	IV
	FveNAC79	FVE26043	VI
Ginkgo biloba	GbiCUC3	Gb_01375	I
	GbiCUC1	Gb_32549	I
	GbiCUC2	Gb_35048	I
Gnetum montanum	GmoCUC1	TnS000141555t02	I
	GmoCUC2A	TnS000223479t02	I
	GmoCUC2B	TnS000387089t07	I
	GmoCUC3	TnS000621957t01	I
Glycine max	GmaCUC2A	Glyma.06G236000	II
	GmaCUC2B	Glyma.12G161700	II
	GmaCUC2C	Glyma.12G226500	II
	GmaCUC2D	Glyma.13G274300	II
	GmaCUC3A	Glyma.04G014900	I
	GmaCUC3B	Glyma.06G014900	I
	GmaNAC100A	Glyma.05G025500	VI
	GmaNAC100B	Glyma.17G101500	VI
	GmaNAC38A	Glyma.04G078600	III
	GmaNAC38B	Glyma.06G080200	III
	GmaNAC38C	Glyma.14G140100	III
	GmaNAC3A	Glyma.09G235700	VI
	GmaNAC3B	Glyma.18G261300	VI
	GmaNAC46A	Glyma.02G070600	V
	GmaNAC46B	Glyma.16G152100	V
	GmaNAC58A	Glyma.05G234200	IV
	GmaNAC58B	Glyma.07G092000	IV
	GmaNAC58C	Glyma.08G041500	IV
	GmaNAC58D	Glyma.09G184100	IV
	GmaNAC6A	Glyma.13G062000	VI
	GmaNAC6B	Glyma.19G024500	VI
	GmaNAC79A	Glyma.04G167200	VI
	GmaNAC79B	Glyma.06G195500	VI
	GmaNAC87A	Glyma.16G042900	V
	GmaNAC87B	Glyma.19G109100	V
Marchantia polymorpha	MpoCUC1	Mapoly0015s0058	VII
	MpoCUC2	Mapoly0035s0046	VII
Musa acuminata	MacCUC2A	Ma10_g22290	II
	MacCUC2B	Ma10_g26130	II
	MacNAC38A	Ma06_g03480	III
	MacNAC38B	Ma07_g21160	III
	MacNAC38C	Ma08_g25500	III
	MacNAC3A	Ma06_g32230	VI
	MacNAC3B	Ma07_g11300	VI
	MacNAC46A	Ma03_g09370	V
	MacNAC46B	Ma03_g19110	V
	MacNAC46C	Ma05_g07360	V
	MacNAC46D	Ma06_g10180	V
	MacNAC46E	Ma06_g33960	V
	MacNAC46F	Ma07_g19650	V
	MacNAC46G	Ma08_g22240	V
	MacNAC46H	Ma09_g04900	V
	MacNAC46I	Ma09_g17040	V
	MacNAC46J	Ma10_g04910	V
	MacNAC58A	Ma08_g17890	IV
	MacNAC58B	Ma10_g19880	IV
	MacNAC6	Ma09_g28160	VI
Nelumbo nucifera	NnuCUC2A	NNU_11179	II
	NnuCUC2C	NNU_25930	II
	NnuCUC3A	NNU_09475	I
	NnuCUC3B	NNU_24042	I
	NnuNAC38A	NNU_03175	III
	NnuNAC38B	NNU_15085	III
	NnuNAC3A	NNU_04634	VI
	NnuNAC3B	NNU_07308	VI
	NnuNAC58A	NNU_00487	IV
	NnuNAC58B	NNU_07691	IV
	NnuNAC6	NNU_24634	VI
	NnuNAC87	NNU_23656	V
Oryza sativa	OsaCUC2	LOC_Os06g23650	II
	OsaCUC3	LOC_Os08g40030	I
	OsaNAC3	LOC_Os02g36880	VI
	OsaNAC38	LOC_Os09g32260	III
	OsaNAC46A	LOC_Os01g01470	V
	OsaNAC46B	LOC_Os01g29840	V
	OsaNAC46C	LOC_Os03g21030	V
	OsaNAC46D	LOC_Os07g48550	V
	OsaNAC58	LOC_Os03g42630	IV
	OsaNAC6	LOC_Os04g38720	VI
Physcomitrella patens	PpaCUC1	Pp3c12_18020	VII
	PpaCUC2	Pp3c16_19830	VII
	PpaCUC3	Pp3c26_4660	VII
	PpaCUC4	Pp3c27_7560	VII
	PpaCUC5	Pp3c3_25610	VII
	PpaCUC6	Pp3c4_11490	VII
Populus trichocarpa	PtrCUC2A	Potri.001G396300	II
	PtrCUC2B	Potri.001G396400	II
	PtrCUC2C	Potri.011G115400	II
	PtrCUC3A	Potri.002G005800	I
	PtrCUC3B	Potri.005G255900	I
	PtrNAC100	Potri.015G020000	VI
	PtrNAC38A	Potri.006G277000	III
	PtrNAC38B	Potri.018G003800	III
	PtrNAC46	Potri.013G054200	V
	PtrNAC58A	Potri.012G056300	IV
	PtrNAC58B	Potri.015G046800	IV
	PtrNAC6	Potri.017G086200	VI
	PtrNAC79	Potri.012G001400	VI
	PtrNAC87	Potri.019G031600	V
Picea abies	PabCUC3	PAB00004920	I
	PabCUC2A	PAB00018302	I
	PabCUC1A	PAB00020627	I
	PabCUC2B	PAB00026484	I
	PabCUC1B	PAB00029565	I
	PabCUC1C	PAB00037780	I
	PabCUC1D	PAB00040751	I
	PabCUC1E	PAB00055883	I
	PabCUC1F	PAB00057842	I
Pseudotsuga menziesii	PmeCUC1A	PME00017923	I
	PmeCUC3	PME00086186	I
	PmeCUC2	PME00098217	I
	PmeCUC1B	PME00106076	I
	PmeCUC1C	PME00128131	I
Picea glauca	PglCUC3	PGL00006160	I
	PglCUC1A	PGL00008060	I
	PglCUC2	PGL00018857	I
	PglCUC1B	PGL00023073	I
Pinus pinaster	PpiCUC1A	PPI00013008	I
	PpiCUC2A	PPI00014533	I
	PpiCUC1B	PPI00015568	I
	PpiCUC2B	PPI00066843	I
	PpiCUC3	PPI00074575	I
Pinus sylvestris	PsyCUC3	PSY00017823	I
	PsyCUC2	PSY00019412	I
	PsyCUC1	PSY00021166	I
Pinus taeda	PtaCUC1A	PTA00001337	I
	PtaCUC1B	PTA00001338	I
	PtaCUC1C	PTA00027080	I
	PtaCUC1D	PTA00041070	I
	PtaCUC2	PTA00043616	I
	PtaCUC3	PTA00053950	I
Selaginella moellendorffii	SmoCUC2	gene12130	VII
	SmoCUC4	gene1923	VII
Salvinia cucullata	ScuCUC1	Sacu_v1.1_s0030.g010470	VII
	ScuCUC2	Sacu_v1.1_s0079.g017784	VII
	ScuCUC3	Sacu_v1.1_s0158.g023777	VII
Sphagnum fallax	SfaCUC1	Sphfalx04G094400	VII
	SfaCUC2	Sphfalx11G058900	VII
	SfaCUC3	Sphfalx11G101100	VII
	SfaCUC4	Sphfalx10G089800	VII
	SfaCUC5	Sphfalx15G032800	VII
	SfaCUC6	Sphfalx15G038500	VII
	SfaCUC7	Sphfalx04G036000	VII
	SfaCUC8	Sphfalx10G084500	VII
Sphagnum magellanicum	SmaCUC1	Sphmag04G097400	VII
	SmaCUC2	Sphmag11G059800	VII
	SmaCUC3	Sphmag11G104700	VII
	SmaCUC4	Sphmag10G084700	VII
	SmaCUC5	Sphmag15G039500	VII
	SmaCUC6	Sphmag15G032800	VII
	SmaCUC7	Sphmag10G079900	VII
	SmaCUC8	Sphmag04G040100	VII
Sequoiadendron giganteum	SgiCUC1	SEGI_29102	I
	SgiCUC2	SEGI_30521	I
	SgiCUC3	SEGI_36251	I
Solanum lycopersicum	SlyCUC2	Solyc07g062840	II
	SlyNAC100	Solyc06g069710	VI
	SlyNAC3	Solyc02g088180	VI
	SlyNAC38A	Solyc05g010740	III
	SlyNAC38B	Solyc08g006020	III
	SlyNAC38C	Solyc08g074300	III
	SlyNAC58A	Solyc06g069100	IV
	SlyNAC58B	Solyc12g036480	IV
	SlyNAC79	Solyc03g115850	VI
Taxus baccata	TbaCUC1	TBA00012562	I
	TbaCUC3	TBA00019982	I
	TbaCUC2	TBA00021033	I
Thuja plicata	TplCUC1	Thupl.29377368s0029	I
	TplCUC2	Thupl.29377213s0002	I
	TplCUC3	Thupl.29377714s0009	I
	TplCUC4	Thupl.29378187s0006	I
Vitis vinifera	VviCUC2	GSVIVG01014287001	II
	VviCUC3	GSVIVG01013419001	I
	VviNAC3	GSVIVG01011445001	VI
	VviNAC38	GSVIVG01035554001	III
	VviNAC46	GSVIVG01033374001	V
	VviNAC58	GSVIVG01008291001	IV
	VviNAC79	GSVIVG01007982001	VI
Welwitschia mirabilis	WmiCUC1	W.mirabilis.23935	I
	WmiCUC2	W.mirabilis.17710	I
Zea mays	ZmaCUC2A	Zm00001d035266	II
	ZmaCUC2B	Zm00001d041791	II
	ZmaCUC3	Zm00001d031463	I
	ZmaNAC38A	Zm00001d006053	III
	ZmaNAC38B	Zm00001d020982	III
	ZmaNAC3A	Zm00001d003414	VI
	ZmaNAC3B	Zm00001d016950	VI
	ZmaNAC3C	Zm00001d050893	VI
	ZmaNAC46A	Zm00001d028995	V
	ZmaNAC46B	Zm00001d047554	V
	ZmaNAC46C	Zm00001d022517	V
	ZmaNAC58A	Zm00001d013717	IV
	ZmaNAC58B	Zm00001d033308	IV

## Sheet: BEL
Species	Name	Accession number	Group
Arabidopsis thaliana	AtBEL1	AT5G41410	AI
	AtBLH1	AT2G35940	BI
	AtBLH2	AT4G36870	AII
	AtBLH3	AT1G75410	CI
	AtBLH4	AT2G23760	AII
	AtBLH5	AT2G27220	BI
	AtBLH6	AT4G34610	CII
	AtBLH7	AT2G16400	CII
	AtBLH8	AT2G27990	AIV
	AtBLH9	AT5G02030	AV
	AtBLH10	AT1G19700	CI
	AtBLH11	AT1G75430	CIII
	AtBLH12	AT4G32980	DI
Abies alba	AalBEL1A	AALBA5B142147P1	AIII
	AalBEL1B	AALBA5B613395P1	AIII
	AalBLH1A	AALBA5B066645P1	AIII
	AalBLH1B	AALBA5B1038924P1	BII
	AalBLH1C	AALBA5B580740P1	BII
	AalBLH1D	AALBA5B983734P1	BII
	AalBLH1F	AALBA5B1031911P1	BII
	AalBLH2	AALBA5B931304P1	AIII
Amborella trichopoda	AtrBEL1	ATR0661G543	AI
	AtrBLH1	ATR0772G020	BI
	AtrBLH2	ATR0733G091	AII
	AtrBLH7	ATR0665G049	CII
	AtrBLH9A	ATR0210G020	AV
	AtrBLH9B	ATR0680G004	AV
Anthoceros angustus	AanBEL1	AANG014019	E
Azolla filiculoides	AfiBLH1_5A	Azfi_s0167.g054547	BIII
	AfiBLH1_5B	Azfi_s0568.g077525	BIII
	AfiBLH1_5C	Azfi_s0007.g010693	BIII
	AfiBLH2_9A	Azfi_s0001.g000170	AVI
	AfiBLH2_9B	Azfi_s0003.g007791	AVI
	AfiBLH2_9C	Azfi_s0007.g011216	AVI
Anthoceros agrestis	AagBEL1	AagrOXF_evm.model.utg000050l.220.1	E
Anthoceros punctatus	ApuBEL1	Apun_evm.model.utg000146l.19.1	E
	ApuBEL2	Apun_evm.model.utg000146l.57.1	E
Brachypodium distachyon	BdiBEL1A	Bradi1g76940	AI
	BdiBEL1B	Bradi3g32040	AI
	BdiBEL1C	Bradi1g51980	AI
	BdiBLH1	Bradi4g25022	BI
	BdiBLH10	Bradi3g26690	CIV
	BdiBLH12A	Bradi1g37800	DI
	BdiBLH12B	Bradi3g08570	DI
	BdiBLH2	Bradi1g09615	AII
	BdiBLH2_9A	Bradi1g12520	AVI
	BdiBLH3	Bradi1g74060	CIV
	BdiBLH6	Bradi4g00740	CIV
	BdiBLH7	Bradi1g12510	CIV
	BdiBLH9A	Bradi2g23530	AV
	BdiBLH9B	Bradi2g54940	AV
Beta vulgaris	BvuBEL1	Bv5_100130_otho	AI
	BvuBLH1A	Bv5_098400_xfou	BI
	BvuBLH1B	Bv7_171150_hihf	BI
	BvuBLH2	Bv6_138090_jcer	AII
	BvuBLH3	Bv1_006740_agqt	CI
	BvuBLH8	Bv9_205380_pzcg	AIV
	BvuBLH9	Bv8_193660_jkcu	AV
	BvuBLH12	Bv_006910_spyx	DI
Coffea canephora	CcaBEL1	Cc08_g15070	AI
	CcaBLH11	Cc10_g02410	CIII
	CcaBLH12	Cc08_g10440	DI
	CcaBLH1A	Cc01_g07670	BI
	CcaBLH1B	Cc06_g06600	BI
	CcaBLH2	Cc07_g05280	AII
	CcaBLH3	Cc10_g02400	CI
	CcaBLH4	Cc10_g03470	AII
	CcaBLH6	Cc02_g17190	CII
	CcaBLH8	Cc01_g10830	AIV
Cycas micholitzii	CmiBLH2	CMI00011954	AIII
Ceratopteris richardii	CriBLH1_5A	Ceric.12G073900	BIII
	CriBLH1_5B	Ceric.39G018400	BIII
	CriBLH1_5C	Ceric.27G023900	BIII
	CriBLH2_9A	Ceric.25G013700	AVI
	CriBLH2_9B	Ceric.26G015100	AVI
	CriBLH2_9C	Ceric.39G021300	AVI
Ceratodon purpureus	CpuBEL1	CepurGG1.7G037800	E
	CpuBEL2	CepurGG1.7G037900	E
	CpuBEL3	CepurGG1.7G038100	E
	CpuBEL4	CepurGG1.7G038200	E
Euryale ferox	EfeBEL1A	g08686.t1	AI
	EfeBEL1B	g12248.t1	AI
	EfeBEL1C	g24433.t1	AI
	EfeBLH12A	g14863.t1	DI
	EfeBLH12B	g32542.t1	DI
	EfeBLH12C	g34752.t1	DI
	EfeBLH1A	g10782.t1	BI
	EfeBLH1B	g20962.t1	BI
	EfeBLH1C	g31069.t1	BI
	EfeBLH1D	g33105.t1	BI
	EfeBLH1E	g35365.t1	BI
	EfeBLH1F	g37623.t1	BI
	EfeBLH2A	g03017.t1	AII
	EfeBLH2B	g09848.t1	AII
	EfeBLH2C	g14340.t1	AII
	EfeBLH2D	g18367.t1	AII
	EfeBLH2E	g30880.t1	AII
	EfeBLH2F	g35281.t1	AII
	EfeBLH6A	g02151.t1	CII
	EfeBLH6B	g05618.t1	CII
	EfeBLH6C	g09524.t1	CII
	EfeBLH6D	g19778.t2	CII
	EfeBLH6E	g21309.t1	CII
	EfeBLH6F	g25976.t1	CII
	EfeBLH9A	g00405.t1	AV
	EfeBLH9B	g05294.t1	AV
	EfeBLH9C	g22681.t2	AV
	EfeBLH9D	g26349.t1	AV
	EfeBLH9E	g38395.t1	AV
	EfeBLH9F	g39264.t3	AV
Fragaria vesca	FveBEL1	FVE31817	AI
	FveBLH1	FVE18314	BI
	FveBLH10	FVE15202	CI
	FveBLH11	FVE15201	CIII
	FveBLH12	FVE02674	DI
	FveBLH2A	FVE29414	AII
	FveBLH2B	FVE29439	AII
	FveBLH7	FVE21861	CII
	FveBLH8	FVE28833	AIV
	FveBLH9A	FVE18718	AV
	FveBLH9B	FVE20865	AV
Ginkgo biloba	GbiBEL1A	Gb_39741	AIII
	GbiBEL1B	Gb_23074	AIII
	GbiBLH1A	Gb_01695	BII
	GbiBLH1B	Gb_28278	BII
	GbiBLH2	Gb_15916	AIII
	GbiBLH5A	Gb_36166	BII
	GbiBLH5B	Gb_22513	BII
Gnetum montanum	GmoBEL1A	TnS000329869t02	AIII
	GmoBEL1B	TnS000264493t13	AIII
	GmoBLH1A	TnS000060573t05	BII
	GmoBLH1B	TnS000450825t01	BII
	GmoBLH2	TnS000243729t01	AIII
	GmoBLH5	TnS000855777t02	BII
Glycine max	GmaBEL1A	Glyma.01G221500	AI
	GmaBEL1B	Glyma.05G210300	AI
	GmaBEL1C	Glyma.08G016900	AI
	GmaBEL1D	Glyma.11G022200	AI
	GmaBLH10A	Glyma.06G029100	CI
	GmaBLH10B	Glyma.04G029100	CI
	GmaBLH10C	Glyma.14G070700	CI
	GmaBLH10D	Glyma.17G254000	CI
	GmaBLH11A	Glyma.04G029200	CIII
	GmaBLH11B	Glyma.06G029200	CIII
	GmaBLH12A	Glyma.04G050800	DI
	GmaBLH12B	Glyma.06G051600	DI
	GmaBLH12C	Glyma.17G230000	DI
	GmaBLH1A	Glyma.02G196500	BI
	GmaBLH1B	Glyma.03G202300	BI
	GmaBLH1C	Glyma.10G081700	BI
	GmaBLH1D	Glyma.12G094800	BI
	GmaBLH1E	Glyma.12G188800	BI
	GmaBLH1F	Glyma.13G312900	BI
	GmaBLH1G	Glyma.19G199500	BI
	GmaBLH1H	Glyma.U009200	BI
	GmaBLH2A	Glyma.01G179900	AII
	GmaBLH2B	Glyma.02G060000	AII
	GmaBLH2C	Glyma.11G062300	AII
	GmaBLH2D	Glyma.16G142800	AII
	GmaBLH7A	Glyma.04G009600	CII
	GmaBLH7B	Glyma.06G009500	CII
	GmaBLH8A	Glyma.11G196300	AIV
	GmaBLH8B	Glyma.12G077800	AIV
	GmaBLH8C	Glyma.12G176400	AIV
	GmaBLH8D	Glyma.13G324200	AIV
	GmaBLH9A	Glyma.01G104200	AV
	GmaBLH9B	Glyma.03G070900	AV
	GmaBLH9C	Glyma.18G189700	AV
Nelumbo nucifera	NnuBEL1A	NNU_04170	AI
	NnuBEL1B	NNU_08620	AI
	NnuBLH11A	NNU_05289	CIII
	NnuBLH11B	NNU_01584	CIII
	NnuBLH11C	NNU_05290	CIII
	NnuBLH12A	NNU_12013	DI
	NnuBLH12B	NNU_16799	DI
	NnuBLH1A	NNU_09740	BI
	NnuBLH1B	NNU_25542	BI
	NnuBLH2A	NNU_09868	AII
	NnuBLH2B	NNU_05471	AII
	NnuBLH8A	NNU_03839	AIV
	NnuBLH8B	NNU_21331	AIV
	NnuBLH9A	NNU_03693	AV
	NnuBLH9B	NNU_18676	AV
Oryza sativa ssp. Japonica	OsaBEL1A	LOC_Os06g01934	AI
	OsaBEL1B	LOC_Os03g03260	AI
	OsaBEL1C	LOC_Os10g39030	AI
	OsaBLH1	LOC_Os11g06020	BI
	OsaBLH12A	LOC_Os02g13310	DI
	OsaBLH12B	LOC_Os06g36680	DI
	OsaBLH2	LOC_Os03g52239	AII
	OsaBLH2_9A	LOC_Os03g47730	AVI
	OsaBLH3	LOC_Os12g43950	CIV
	OsaBLH5	LOC_Os12g06340	BI
	OsaBLH6	LOC_Os03g06930	CIV
	OsaBLH7	LOC_Os03g47740	CIV
	OsaBLH9A	LOC_Os01g62920	AV
	OsaBLH9B	LOC_Os05g38120	AV
Physcomitrella patens	PpaBEL1	Pp3c15_11880	E
	PpaBEL2	Pp3c9_6780	E
	PpaBEL3	Pp3c13_7150	E
	PpaBEL4	Pp3c4_27700	E
Populus trichocarpa	PtrBEL1A	Potri.001G100800	AI
	PtrBEL1B	Potri.003G131300	AI
	PtrBLH11A	Potri.002G030900	CIII
	PtrBLH11B	Potri.005G232000	CIII
	PtrBLH12A	Potri.006G230700	DI
	PtrBLH12B	Potri.018G054700	DI
	PtrBLH1A	Potri.001G216600	BI
	PtrBLH1B	Potri.006G203000	BI
	PtrBLH1C	Potri.009G017400	BI
	PtrBLH1D	Potri.016G069700	BI
	PtrBLH2	Potri.005G129500	AII
	PtrBLH4	Potri.007G032700	AII
	PtrBLH7A	Potri.009G120800	CII
	PtrBLH7B	Potri.004G159300	CII
	PtrBLH7C	Potri.002G031000	CII
	PtrBLH8B	Potri.004G213300	AIV
	PtrBLH8C	Potri.009G009900	AIV
	PtrBLH8E	Potri.009G009800	AIV
	PtrBLH9A	Potri.008G061000	AV
	PtrBLH9B	Potri.010G197300	AV
Picea abies	PabBEL1A	PAB00014831	AIII
	PabBEL1B	PAB00050916	AIII
	PabBLH1A	PAB00028893	BII
	PabBLH1B	PAB00014088	BII
	PabBLH1C	PAB00054482	BII
	PabBLH2	PAB00035566	AIII
	PabBLH5	PAB00018552	BII
Pseudotsuga menziesii	PmeBEL1A	PME00003866	AIII
	PmeBEL1B	PME00003310	AIII
	PmeBLH1A	PME00056482	BII
	PmeBLH1B	PME00056483	BII
	PmeBLH1C	PME00056478	BII
	PmeBLH1D	PME00018300	BII
	PmeBLH1E	PME00056479	BII
	PmeBLH1F	PME00056509	BII
	PmeBLH1G	PME00056510	BII
	PmeBLH2	PME00082948	AIII
	PmeBLH5A	PME00056477	BII
	PmeBLH5B	PME00001867	BII
	PmeBLH5C	PME00056480	BII
	PmeBLH5D	PME00056495	BII
	PmeBLH5E	PME00056496	BII
	PmeBLH5F	PME00056504	BII
	PmeBLH5G	PME00056505	BII
Pinus pinaster	PpiBEL1A	PPI00070127	AIII
	PpiBEL1B	PPI00030013	AIII
	PpiBLH1A	PPI00030999	BII
	PpiBLH1B	PPI00049031	BII
	PpiBLH1C	PPI00063585	BII
Picea sitchensis	PsiBEL1	PSI00004646	AIII
	PsiBLH1B	PSI00011910	BII
	PsiBLH1A	PSI00019668	BII
Picea glauca	PglBEL1	PGL00019292	AIII
	PglBLH1A	PGL00017762	BII
	PglBLH1B	PGL00018116	BII
	PglBLH1C	PGL00012636	BII
	PglBLH1D	PGL00018125	BII
	PglBLH5	PGL00016681	BII
Pinus sylvestris	PsyBEL1	PSY00020293	AIII
	PsyBLH1A	PSY00008094	BII
	PsyBLH1B	PSY00017040	BII
	PsyBLH5	PSY00009432	BII
Pinus taeda	PtaBEL1A	PTA00051305	AIII
	PtaBEL1B	PTA00022013	AIII
	PtaBEL1C	PTA00026197	AIII
	PtaBLH1A	PTA00016337	BII
	PtaBLH1B	PTA00065202	BII
	PtaBLH1C	PTA00066838	BII
	PtaBLH1D	PTA00051945	BII
	PtaBLH2	PTA00036585	AIII
	PtaBLH5	PTA00022180	BII
Selaginella moellendorffii	SmoBEL1	gene16104	DII
	SmoBEL2	gene35855	DII
	SmoBEL3	gene3801	DII
	SmoBEL4	gene9893	DII
Sphagnum fallax	SfaBEL1	Sphfalx03G024800	E
	SfaBEL2	Sphfalx18G034700	E
Sphagnum magellanicum	SmaBEL1	Sphmag03G019700	E
	SmaBEL2	Sphmag18G067800	E
Salvinia cucullata	ScuBLH1_5A	Sacu_v1.1_s0016.g006822	BIII
	ScuBLH1_5B	Sacu_v1.1_s0096.g019369	BIII
	ScuBLH1_5C	Sacu_v1.1_s0009.g004543	BIII
	ScuBLH1_5D	Sacu_v1.1_s3593.g028854	BIII
	ScuBLH2_9A	Sacu_v1.1_s0025.g009261	AVI
	ScuBLH2_9B	Sacu_v1.1_s0126.g021768	AVI
	ScuBLH2_9C	Sacu_v1.1_s0197.g025522	AVI
	ScuBLH2_9D	Sacu_v1.1_s0195.g025474	AVI
Sequoiadendron giganteum	SgiBEL1A	SEGI_33490	AIII
	SgiBEL1B	SEGI_00967	AIII
	SgiBLH1A	SEGI_01313	BII
	SgiBLH1B	SEGI_01898	BII
	SgiBLH1C	SEGI_14282	BII
	SgiBLH1E	SEGI_26323	BII
	SgiBLH1F	SEGI_41579	BII
	SgiBLH2A	SEGI_22959	AIII
	SgiBLH2B	SEGI_27936	AIII
	SgiBLH2C	SEGI_34347	AIII
Solanum lycopersicum	SlyBEL1	Solyc08g081400	AI
	SlyBLH11	Solyc04g080780	CIII
	SlyBLH12	Solyc08g065420	DI
	SlyBLH1A	Solyc11g068950	BI
	SlyBLH1B	Solyc06g074120	BI
	SlyBLH1C	Solyc01g007070	BI
	SlyBLH2A	Solyc04g079830	AII
	SlyBLH2B	Solyc02g089940	AII
	SlyBLH3	Solyc04g080790	CI
	SlyBLH4	Solyc02g065490	AII
	SlyBLH6	Solyc01g109980	CII
	SlyBLH8	Solyc11g069890	AIV
	SlyBLH9A	Solyc09g011380	AV
	SlyBLH9B	Solyc10g086640	AV
Taxus baccata	TbaBEL1A	TBA00006614	AIII
	TbaBEL1B	TBA00012181	AIII
	TbaBLH1A	TBA00008468	BII
	TbaBLH1B	TBA00017518	BII
	TbaBLH2A	TBA00000095	AIII
	TbaBLH2B	TBA00019496	AIII
	TbaBLH2C	TBA00031524	AIII
	TbaBLH5	TBA00031004	BII
Thuja plicata	TplBEL1A	Thupl.29377535s0003	AIII
	TplBEL1B	Thupl.29381803s0008	AIII
	TplBLH1A	Thupl.29378131s0014	BII
	TplBLH1B	Thupl.29379413s0003	BII
	TplBLH1C	Thupl.29380745s0001	BII
	TplBLH2	Thupl.29379592s0002	AIII
	TplBLH4	Thupl.29379592s0001	AIII
Vitis vinifera	VviBEL1	GSVIVG01019399001	AI
	VviBLH11	GSVIVG01009779001	CIII
	VviBLH12	GSVIVG01035361001	DI
	VviBLH1A	GSVIVG01011146001	BI
	VviBLH1B	GSVIVG01037575001	BI
	VviBLH2A	GSVIVG01009633001	AII
	VviBLH2B	GSVIVG01019043001	AII
	VviBLH3	GSVIVG01009781001	CI
	VviBLH7	GSVIVG01024224001	CII
	VviBLH8	GSVIVG01025220001	AIV
	VviBLH9A	GSVIVG01034073001	AV
	VviBLH9B	GSVIVG01016458001	AV
Welwitschia mirabilis	WmiBEL1A	W.mirabilis.20549	AIII
	WmiBEL1B	W.mirabilis.01270	AIII
	WmiBLH1A	W.mirabilis.05570	BII
	WmiBLH1B	W.mirabilis.07121	BII
	WmiBLH1C	W.mirabilis.14952	BII
	WmiBLH1D	W.mirabilis.14953	BII
	WmiBLH2	W.mirabilis.03492	AIII
	WmiBLH4	W.mirabilis.11342	AIII
	WmiBLH5	W.mirabilis.09214	BII
Zea mays	ZmaBEL1A	Zm00001d027435	AI
	ZmaBEL1B	Zm00001d029736	AI
	ZmaBEL1C	Zm00001d035907	AI
	ZmaBLH1	Zm00001d053151	BI
	ZmaBLH10	Zm00001d013547	CIV
	ZmaBLH12A	Zm00001d016298	DI
	ZmaBLH12B	Zm00001d046223	DI
	ZmaBLH2_9A	Zm00001d033379	AVI
	ZmaBLH3	Zm00001d031182	CIV
	ZmaBLH4	Zm00001d033898	AII
	ZmaBLH6	Zm00001d027802	CIV
	ZmaBLH7	Zm00001d033378	CIV
	ZmaBLH9A	Zm00001d010060	AV
	ZmaBLH9B	Zm00001d038355	AV
	ZmaBLH9C	Zm00001d042864	AV

## Sheet: SPL
Species	Name	Accession number	Group
Arabidopsis thaliana	AtSPL	AT4G27330	I
	AtSPEAR1	AT2G20080	II
	AtSPEAR2	AT2G34010	III
	AtSPEAR3	AT4G28840	II
	AtSPEAR4	AT1G29010	III
Anthoceros agrestis	AagSPEAR1	AagrOXF_evm.model.utg000126l.215.1
Anthoceros punctatus	ApuSPEAR1	Apun_evm.model.utg000045l.185.1
Abies alba	AalSPEAR_B	AALBA5B121141P1	V
	AalSPEAR_A	AALBA5B749861P1	IV
	AalSPEAR_C	AALBA5B173413P1	VI
Amborella trichopoda	AtrSPEAR_A	ATR0602G093	IV
	AtrSPL	ATR1132G078	I
Azolla filiculoides	AfiSPEAR1	Azfi_s0139.g051205
Brachypodium distachyon	BdiSPEAR1_3A	Bradi2g46460	II
	BdiSPEAR2	Bradi1g61186
	BdiSPEAR2_4A	Bradi2g07780	III
	BdiSPEAR2_4B	Bradi2g20670	III
	BdiSPEAR2_4C	Bradi2g06832	III
	BdiSPEAR1_3B	Bradi2g16858	II
Beta vulgaris	BvuSPEAR1	Bv8_196910_pczf	II
Coffea canephora	CcanSPEAR1	Cc06_g10070	II
	CcanSPEAR2	Cc05_g11450	III
Ceratopteris richardii	CriSPEAR_L1	Ceric.29G040900	VII
	CriSPEAR1_3A	Ceric.23G076500	II
Ceratodon purpureus	CpuSPEAR_L1	CepurGG1.4G024700	VII
	CpuSPEAR_L2	CepurGG1.9G046300	VII
Daucus carota
	DcaSPEAR1_3A	DCAR_010477	II
	DcaSPEAR1_3B	DCAR_012057	II
	DcaSPL	DCAR_008691	I
	DcaSPEAR2_4A	DCAR_013141	III
	DcaSPEAR2_4B	DCAR_019586	III
	DcaSPEAR2_4C	DCAR_021012	III
	DcaSPEAR2_4D	DCAR_024487	III
Euryale ferox	EfeSPEAR1_3A	g24679.t1	II
	EfeSPEAR1_3B	g39123.t1	II
	EfeSPL1	g22989.t1	I
	EfeSPL2	g34014.t1	I
	EfeSPL3	g37350.t1	I
Fragaria vesca	FveSPEAR1	FVE11864	II
	FveSPL	FVE26271	I
	FveSPEAR2	FVE27169	III
Ginkgo biloba	GbiSPEAR_B	Gb_31711	V
	GbiSPEAR_C	Gb_21350	VI
Gnetum montanum	GmoSPEAR_A	TnS000996777t15	IV
	GmoSPEAR_B	TnS000057613t17	V
Glycine max	GmaSPL1	Glyma.12G217800	I
	GmaSPL2	Glyma.13G282800	I
	GmaSPEAR1_3A	Glyma.01G145600	II
	GmaSPEAR1_3B	Glyma.05G229100	II
	GmaSPEAR1_3C	Glyma.08G036100	II
	GmaSPEAR1_3D	Glyma.09G193400	II
	GmaSPEAR2_4A	Glyma.15G079800	III
	GmaSPEAR2_4B	Glyma.06G232800	III
	GmaSPEAR2_4C	Glyma.13G271900	III
	GmaSPEAR2_4D	Glyma.06G232600	III
	GmaSPEAR2_4E	Glyma.12G228100	III
Musa acuminata	MacSPL	Ma06_g25620	I
	MacSPEAR1_3A	Ma10_g22160	II
	MacSPEAR2	Ma04_g37720
	MacSPEAR2	Ma10_g27860	III
	MacSPEAR1_3B	Ma08_g28010	II
	MacSPEAR1_3C	Ma06_g28440	II
	MacSPEAR1_3D	Ma02_g17100	II
Marchantia polymorpha	MpoSPEAR_L1	Mapoly0019s0053	VII
Nelumbo nucifera	NnuSPL1	Nn1g06831	I
	NnuSPL2	Nn1g03824	I
	NnuSPEAR1_3A	Nn2g11654	II
	NnuSPEAR1_3B	Nn3g18137	II
	NnuSPEAR2_4A	Nn1g09023	III
	NnuSPEAR2_4B	Nn1g04330	III
Oryza sativa ssp. Japonica	OsaSPEAR1_3A	LOC_Os01g48530	II
	OsaSPEAR2_4A	LOC_Os01g11430	III
	OsaSPEAR2_4B	LOC_Os05g42240	III
	OsaSPEAR1_3B	LOC_Os05g48570	II
Picea abies	PabSPEAR_B	PAB00021419	V
	PabSPEAR_A	PAB00016237	IV
	PabSPEAR_C	PAB00045302	VI
Pseudotsuga menziesii	PmeSPEAR_A1	PME00024501	IV
	PmeSPEAR_A2	PME00104859	IV
Pinus pinaster	PpiSPEAR_A	PPI00074646	IV
	PpiSPEAR_C	PPI00053986	VI
	PpiSPEAR_B	PPI00052978	V
Pinus taeda	PtaSPEAR_A	PTA00063464	IV
	PtaSPEAR_B	PTA00068688	V
Pinus sylvestris	PsySPEAR_A	PSY00017976	IV
	PsySPEAR_C	PSY00019215	VI
Physcomitrella patens	PpaSPEAR_L1	Pp3c2_26200	VII
	PpaSPEAR_L2	Pp3c4_31500	VII
	PpaSPEAR_L3	Pp3c1_13420	VII
Populus trichocarpa	PtrSPL1	Potri.001G409000	I
	PtrSPEAR1_3A	Potri.006G161100	II
	PtrSPEAR1_3B	Potri.018G084100	II
	PtrSPEAR2_4A	Potri.004G052900	III
	PtrSPEAR2_4B	Potri.001G375600	III
	PtrSPL2	Potri.011G125600	I
Sphagnum fallax	SfaSPEAR_L1	Sphfalx06G039900	VII
	SfaSPEAR_L2	Sphfalx09G033400	VII
Sphagnum magellanicum	SmaSPEAR_L1	Sphmag06G038600	VII
	SmaSPEAR_L2	Sphmag09G086300	VII
Selaginella moellendorffii	SmoSPEAR1_3A		II
	SmoSPEAR1_3B	gene11899	II
	SmoSPEAR1_3C	gene3338	II
Salvinia cucullata	ScuSPEAR1	Sacu_v1.1_s0039.g012255
Sequoiadendron giganteum	SgiSPEAR1	SEGI_20550
	SgiSPEAR_B	SEGI_31349	V
	SgiSPEAR_A	SEGI_16969	IV
Thuja plicata	TplSPEAR_A	Thupl.29378202s0001	IV
	TplSPEAR_B	Thupl.29379208s0006	V
Solanum lycopersicum	SlySPL	Solyc07g063670	I
	SlySPEAR1_3A	Solyc07g018370	II
	SlySPEAR1_3B	Solyc12g007240	II
	SlySPEAR2_4A	Solyc07g062685	III
	SlySPEAR2_4B	Solyc12g014120	III
	SlySPEAR5	Solyc10g007156
Vitis vinifera	VviSPL	GSVIVG01014468001	I
	VviSPEAR1	GSVIVG01015346001	II
	VviSPEAR2_4A	GSVIVG01014239001	III
	VviSPEAR2_4B	GSVIVG01021165001	III
Welwitschia mirabilis	WmiSPEAR_A1	W.mirabilis.02251	IV
	WmiSPEAR_A2	W.mirabilis.02250	IV
	WmiSPEAR_B	W.mirabilis.08133	V
Zea mays	ZmaSPEAR1_3A	Zm00001d009525	II
	ZmaSPEAR1_3B	Zm00001d011592	II
	ZmaSPEAR1_3C	Zm00001d043874	II
	ZmaSPEAR2_4A	Zm00001d039378	III
	ZmaSPEAR2_4B	Zm00001d008912	III
	ZmaSPEAR2_4C	Zm00001d038617	III
	ZmaSPEAR1_3D	Zm00001d039297	II

## Sheet: C3HDZ
Species	Name	Accession number	Group
Arabidopsis thaliana	AtPHB	AT2G34710	I
	AtPHV	AT1G30490	I
	AtREV	AT5G60690	II
	AtCNA	AT1G52150	III
	AtHB8	AT4G32880	IV
Anthoceros angustus	AanHDZ1	AANG012467	VII
Anthoceros agrestis	AagHDZ1	AagrOXF_evm.model.utg000059l.147.1	VII
Anthoceros punctatus	ApuHDZ1	Apun_evm.model.utg000023l.1050.1	VII
Amborella trichopoda	AtrPHV	ATR0048G047	I
	AtrPHB	ATR0165G014	I
	AtrHB8	ATR0705G054	IV
Azolla filiculoides	AfiHDZ1	Azfi_s0341.g065655	VI
	AfiHDZ2A	Azfi_s0047.g030268	V
	AfiHDZ2B	Azfi_s0121.g046826	V
	AfiHDZ2C	Azfi_s0004.g008557	V
Abies alba	AalCNA	AALBA5B075290P1	III
	AalHB8	AALBA5B552462P1	IV
	AalPHB	AALBA5B567226P2	I
	AalHDZ2	AALBA5B635107P1	V
Brachypodium distachyon	BdiHB8	Bradi2g06210	IV
	BdiPHB	Bradi4g01887	I
	BdiREV	Bradi3g28970	II
	BdiPHV	Bradi1g13910	I
Beta vulgaris	BvuHB8	Bv2_032530_xysi	IV
	BvuREV	Bv9_207830_hxcw	II
	BvuCNA	Bv9_221790_dgis	III
Coffea canephora	CcaHB8	Cc08_g09740	IV
	CcaPHB	Cc09_g08040	I
Chlorokybus atmophyticus	CatHDZ1	Chrsp86S08029	VII
Coleochaete orbicularis	CorHDZ1	COLORtr_m240lflr_GBSL01012035	VII
Ceratopteris richardii	CriHDZ2A	Ceric.06G052700	V
	CriPHB1	Ceric.07G076100	I
	CriPHB2	Ceric.17G020900	I
	CriHDZ2B	Ceric.17G083000	V
	CriHDZ1	Ceric.18G068400	VI
	CriHDZ2C	Ceric.23G045900	V
	CriHDZ2D	Ceric.31G005400	V
Ceratodon purpureus	CpuHDZ1	CepurGG1.5G176300	VII
	CpuHDZ2	CepurGG1.4G231900	VII
	CpuHDZ3	CepurGG1.4G232500	VII
Cycas_micholitzii	CmiPHB	scaffold-XZUY-2007581-Cycas_micholitzii	I
	CmiPHV	scaffold-XZUY-2007582-Cycas_micholitzii	I
Euryale ferox	EfePHB1	g02323.t1	I
	EfePHB2	g05937.t1	I
	EfeCNA1	g15629.t1	III
	EfeCNA2	g24002.t1	III
	EfeCNA3	g24646.t1	III
	EfePHV	g38828.t1	I
Fragaria vesca	FveHB8	FVE08999	IV
	FveREV	FVE21561	II
	FveCNA	FVE25646	III
	FvePHB	FVE28942	I
Ginkgo biloba	GbiREV	Gb_02083	II
	GbiHB8	Gb_22761	IV
	GbiHDZ1	Gb_10259	VI
	GbiPHB	Gb_18245	I
	GbiHDZ2	Gb_18240	V
Gnetum montanum	GmoPHB	TnS000555469t01	I
	GmoHB8	TnS000362099t01	IV
	GmoREV	TnS000719089t25	II
	GmoCNA	TnS000117879t05	III
	GmoHDZ1	TnS000681241t03	VI
Glycine max	GmaHB8A	Glyma.04G085000	IV
	GmaPHB1	Glyma.05G166400	I
	GmaHB8B	Glyma.06G086600	IV
	GmaPHB2	Glyma.09G023600	I
	GmaPHB3	Glyma.15G129700	I
	GmaPHB4	Glyma.08G124400	I
	GmaCNA1	Glyma.07G016500	III
	GmaCNA2	Glyma.07G016700	III
	GmaCNA3	Glyma.08G201900	III
	GmaCNA4	Glyma.08G202000	III
	GmaREV1	Glyma.11G145800	II
	GmaREV2	Glyma.12G075800	II
Gossypium raimondii	GraHB8A	Gorai.001G026800	IV
	GraREV1	Gorai.003G142200	II
	GraREV2	Gorai.004G229400	II
	GraHB8B	Gorai.010G105900	IV
	GraPHB	Gorai.011G004200	I
	GraHB8C	Gorai.009G049100	IV
	GraREV3	Gorai.009G107500	II
	GraCNA	Gorai.009G136800	III
	GraREV4	Gorai.013G266900	II
Marchantia polymorpha	MpoHDZ1	Mapoly0061s0107	VII
Musa acuminata	MacPHV	Ma08_g02850	I
	MacPHB1	Ma04_g38190	I
	MacPHB2	Ma04_g34900	I
	MacPHB3	Ma02_g14880	I
	MacPHB4	Ma05_g02340	I
	MacREV	Ma05_g20850	II
	MacHB8A	Ma08_g20910	IV
	MacPHB5	Ma07_g01070	I
	MacHB8B	Ma05_g06330	IV
Malus domestica	MdoHB8A	MDO.mRNA.g.2021.10	IV
	MdoPHB	MDO.mRNA.g.2582.19	I
	MdoCNA1	MDO.mRNA.g.3489.8	III
	MdoHB8B	MDO.mRNA.g.4.57	IV
	MdoPHV	MDO.mRNA.g.759.34	I
	MdoCNA2	MDO.mRNA.g.67.9	III
	MdoREV	MDO.mRNA.g.5716.7	II
Nelumbo nucifera	NnuPHB	NNU_10620	I
	NnuREV	NNU_12554	II
	NnuCNA1	NNU_16909	III
	NnuCNA2	NNU_26074	III
Klebsormidium flaccidum	KflHDZ1	kfl00373_0100	VII
Oryza sativa ssp. Japonica	OsaHB8	LOC_Os01g10320	IV
	OsaPHB	LOC_Os03g43930	I
	OsaPHV	LOC_Os12g41860	I
	OsaREV1	LOC_Os03g01890	II
	OsaREV2	LOC_Os10g33960	II
Physcomitrella patens	PpaHDZ1	Pp3c16_15450	VII
	PpaHDZ2	Pp3c12_14370	VII
	PpaHDZ3	Pp3c3_30010	VII
	PpaHDZ4	Pp3c4_5300	VII
	PpaHDZ5	Pp3c10_19630	VII
Picea abies	PabREV	PAB00018721	II
	PabHB8	PAB00007090	IV
	PabPHV	PAB00030951	I
	PabHDZ1	PAB00008954	VI
	PabCNA	PAB00015443	III
Picea glauca	PglCNA	PGL00003388	III
	PglREV	PGL00008702	II
	PglHDZ1	PGL00011456	VI
	PglHB8	PGL00016585	IV
	PglPHB	PGL00023611	I
Populus trichocarpa	PtrCNA1	Potri.001G188800	III
	PtrPHB	Potri.001G372300	I
	PtrCNA2	Potri.003G050100	III
	PtrHB8A	Potri.006G237500	IV
	PtrHB8B	Potri.018G045100	IV
	PtrPHV	Potri.011G098300	I
	PtrREV1	Potri.009G014500	II
	PtrREV2	Potri.004G211300	II
Pseudotsuga menziesii	PmeCNA1	PME00108182	III
	PmeCNA2	PME00108190	III
	PmeCNA3	PME00108188	III
	PmeHB8A	PME00022985	IV
	PmeHB8B	PME00042276	IV
	PmeHDZ1	PME00096285	VI
	PmeHDZ2	PME00094052	V
	PmePHB1	PME00070191	I
	PmePHB2	PME00070210	I
	PmePHB3	PME00070216	I
	PmePHB5	PME00070197	I
	PmePHV1	PME00070187	I
	PmePHV2	PME00070182	I
	PmeREV1	PME00070201	II
	PmeREV2	PME00070213	II
Pinus pinaster	PpiHB8	PPI00070076	IV
	PpiPHB	PPI00072575	I
	PpiREV	PPI00007723	II
	PpiHDZ1	PPI00017645	VI
Pinus sylvestris	PsyREV	PSY00016135	II
	PsyPHB	PSY00016191	I
	PsyHB8	PSY00009265	IV
	PsyHDZ1	PSY00007067	VI
	PsyHDZ2	PSY00018765	V
Picea sitchensis	PsiPHB	PSI00005831	I
	PsiCNA	PSI00015294	III
	PsiREV	PSI00018963	II
Pinus taeda	PtaPHB	PTA00029006	I
	PtaHB8	PTA00083395	IV
	PtaHDZ1	PTA00084087	VI
	PtaHDZ2	PINTA_000010078	V
Selaginella moellendorffii	SmoHDZ1	gene2499	VII
	SmoHDZ2	gene26503	VII
	SmoHDZ3	gene1159	VII
Sphagnum fallax	SfaHDZ1	Sphfalx02G032100	VII
	SfaHDZ2	Sphfalx05G111500	VII
	SfaHDZ3	Sphfalx07G079300	VII
	SfaHDZ4	Sphfalx08G073700	VII
	SfaHDZ5	Sphfalx09G078700	VII
Sphagnum magellanicum	SmaHDZ1	Sphmag02G032900	VII
	SmaHDZ2	Sphmag05G121700	VII
	SmaHDZ3	Sphmag07G079600	VII
	SmaHDZ4	Sphmag08G069700	VII
	SmaHDZ5	Sphmag09G035500	VII
Solanum lycopersicum	SlyCNA1	Solyc03g120910	III
	SlyHB8	Solyc08g066500	IV
	SlyCNA2	Solyc12g044410	III
	SlyPHB	Solyc02g069830	I
	SlyPHV	Solyc02g024070	I
	SlyREV	Solyc11g069470	II
Salvinia cucullata	ScuHDZ1	Sacu_v1.1_s0156.g023644	VI
	ScuPHB	Sacu_v1.1_s0123.g021492	I
	ScuHDZ2B	Sacu_v1.1_s0022.g008634	V
	ScuHDZ2A	Sacu_v1.1_s0103.g019961	V
Sequoiadendron giganteum	SgiHB8	SEGI_00526	IV
	SgiHDZ1	SEGI_13683	VI
	SgiPHB	SEGI_17801	I
	SgiHDZ2	SEGI_31662	V
Taxus baccata	TbaPHB	TBA00021695	I
	TbaHDZ2	TBA00030564	V
Thuja plicata	TplHB8	Thupl.29378958s0002	IV
	TplHDZ2	Thupl.29380568s0004	V
	TplPHB	Thupl.29381397s0006	I
	TplHDZ1	Thupl.29380613s0006	VI
Vitis vinifera	VviREV1	GSVIVG01016272001	II
	VviCNA	GSVIVG01017010001	III
	VviPHB	GSVIVG01021625001	I
	VviREV2	GSVIVG01025193001	II
	VviHB8	GSVIVG01035612001	IV
Welwitschia mirabilis	WmiPHB	W.mirabilis.15744	I
	WmiCNA	W.mirabilis.05473	III
	WmiREV	W.mirabilis.09166	II
	WmiHDZ1	W.mirabilis.13452	VI
	WmiHDZ2	W.mirabilis.08153	V
Zea mays	ZmaHB8	Zm00001d008869	IV
	ZmaPHB1	Zm00001d013699	I
	ZmaPHB2	Zm00001d041489	I
	ZmaPHV	Zm00001d033246	I
	ZmaREV1	Zm00001d032681	II
	ZmaREV2	Zm00001d048527	II
	ZmaPHB3	Zm00001d031061	I
	ZmaREV3	Zm00001d027317	II

## Sheet: INO
Species	Name	Accession number	Group
Arabidopsis thaliana	AtFIL	AT2G45190	I
	AtYAB2	AT1G08465	IV
	AtYAB3	AT4G00180	I
	AtINO	AT1G23420	II
	AtYAB5	AT2G26580	V
	AtCRC	AT1G69180	III
Abies alba	AalYAB2_5B	AALBA5B578327P1	VI
	AalYAB2_5A	AALBA5B684005P1	VI
	AalYAB2_5D	AALBA5B797859P2 partial_cds	VI
Anthoceros agrestis	AagYAB1	AagrOXF_evm.TU.utg000140l.96	VII
Anthoceros punctatus	ApuYAB1	Apun_evm.TU.utg000132l.366	VII
Amborella trichopoda	AtrCRC	ATR0827G016	III
	AtrYAB2	ATR0697G223	IV
	AtrINO	ATR1091G097	II
	AtrYAB5	ATR1120G104	V
	AtrFIL	ATR1152G046	I
Beta vulgaris	BvuYAB5	Bv8_194200_tpei	V
	BvuYAB2	Bv7_171330_nfki	IV
	BvuFIL1	Bv1_018710_eozo	I
	BvuFIL2	Bv5_097950_pegm	I
	BvuINO	Bv6_148590_xhag	II
	BvuCRC	Bv6_136200_urpg	III
Brachypodium distachyon	BdiYAB2A	Bradi1g13570	IV
	BdiINO	Bradi1g24051	II
	BdiYAB2B	Bradi1g57070	IV
	BdiFIL1	Bradi3g30410	I
	BdiFIL2	Bradi3g50050	I
	BdiYAB2C	Bradi4g01300	IV
	BdiFIL3	Bradi5g16910	I
	BdiCRC	Bradi1g69900	III
Coffea canephora	CcaYAB2	Cc01_g07860	IV
	CcaINO	Cc11_g15350	II
	CcaYAB5	Cc06_g08310	V
	CcaCRC	Cc11_g11750	III
	CcaFIL1	Cc08_g12950	I
	CcaFIL2	Cc00_g13830	I
Cycas micholitzii	CmiYAB2_5A1	scaffold-XZUY-2001014-Cycas_micholitzii	VI
	CmiYAB2_5A2	scaffold-XZUY-2006458-Cycas_micholitzii	VI
	CmiYAB2_5B1	scaffold-XZUY-2007968-Cycas_micholitzii	VI
	CmiYAB2_5B2	scaffold-XZUY-2012095-Cycas_micholitzii	VI
	CmiYAB2_5B3	scaffold-XZUY-2012096-Cycas_micholitzii	VI
Ceratophyllum demersum	CdeYAB2A	gene_prefix00631.t1	IV
	CdeYAB5B	gene_prefix01044.t1	V
	CdeFIL1	gene_prefix05383.t1	I
	CdeFIL2	gene_prefix06186.t1	I
	CdeFIL3	gene_prefix06246.t1	I
	CdeYAB2B	gene_prefix11717.t1	IV
	CdeFIL4	gene_prefix19343.t2	I
	CdeYAB5D	gene_prefix20540.t1	V
	CdeYAB5E	gene_prefix21162.t1	V
	CdeFIL5	gene_prefix21522.t1	I
	CdeYAB5F	gene_prefix23044.t1	V
	CdeFIL6	gene_prefix24588.t1	I
	CdeFIL7	gene_prefix27910.t1	I
Daucus carota	DcaCRC1	DCAR_026683	III
	DcaFIL1	DCAR_004921	I
	DcaFIL2	DCAR_027801	I
	DcaYAB2A	DCAR_012254	IV
	DcaCRC2	DCAR_030050	III
	DcaYAB2B	DCAR_006190	IV
	DcaYAB5	DCAR_014892	V
	DcaFIL3	DCAR_031517	I
	DcaINO	DCAR_007074	II
	DcaFIL4	DCAR_008543	I
	DcaFIL5	DCAR_008464	I
Euryale ferox	EfeCRC1	g01804.t1	III
	EfeCRC2	g27981.t1	III
	EfeYAB5A	g03341.t2	V
	EfeFIL1	g06932.t1	I
	EfeYAB2A	g09080.t1	IV
	EfeFIL2	g13435.t1	I
	EfeYAB2B	g20583.t2	IV
	EfeYAB5C	g21078.t2	V
	EfeYAB5B	g21929.t1	V
	EfeYAB2C	g26971.t1	IV
	EfeYAB2D	g32255.t1	IV
	EfeCRC3	g38306.t1	III
	EfeFIL3	g00362.t1	I
Encephalartos barteri	EbaYAB2_5B	GNQG_scaffold_2084490	VI
Fragaria vesca	FveFIL1	FvH4_7g11260	I
	FveCRC	FvH4_4g29650	III
	FveYAB2	FvH4_3g26130	IV
	FveFIL2	FvH4_5g00320	I
	FveYAB5	FvH4_1g03040	V
	FveINO	FvH4_4g32910	II
Emiliania huxleyi	EhuYAB1A	emh754040	VII
	EhuYAB1B	emh265000	VII
	EhuYAB1C	emh630160	VII
	EhuYAB1D	emh672620	VII
Ginkgo biloba	GbiYAB2_5A	Gb_08231	VI
	GbiYAB2_5B	Gb_36880	VI
	GbiYAB2_5D	Gb_22423	VI
Gnetum montanum	GmoYAB2_5C	TnS000576751t03	VI
	GmoYAB2_5A	TnS000841521t02	VI
	GmoYAB2_5B1	TnS000879045t07	VI
	GmoYAB2_5D	TnS000159553t01	VI
	GmoYAB2_5B2	TnS000134777t12	VI
Glycine max	GmaINO1	Glyma.01G029300	II
	GmaINO2	Glyma.04G094800	II
	GmaINO3	Glyma.06G096500	II
	GmaINO4	Glyma.08G285200	II
	GmaINO5	Glyma.18G140400	II
	GmaCRC1	Glyma.01G063500	III
	GmaCRC2	Glyma.02G121100	III
	GmaFIL1	Glyma.01G137200	I
	GmaFIL2	Glyma.03G029800	I
	GmaFIL3	Glyma.05G056000	I
	GmaYAB2A	Glyma.06G308900	IV
	GmaYAB2B	Glyma.12G096000	IV
	GmaYAB2C	Glyma.12G190500	IV
	GmaYAB5A	Glyma.13G157800	V
	GmaYAB2D	Glyma.13G311200	IV
	GmaYAB5B	Glyma.17G113400	V
	GmaFIL4	Glyma.17G138200	I
Huperzia selago	HseYAB1	ASU87387	VII
Micromonas commoda	McoYAB1A	MCO11G530	VII
	McoYAB1B	MCO09G245	VII
	McoYAB1C	MCO05G110	VII
Micromonas pusilla	MpuYAB1	57415	VII
Musa acuminata	MacINO	Ma05_t25970	II
	MacYAB2A	Ma02_t14680	IV
	MacYAB2B	Ma03_t15930	IV
	MacYAB2C	Ma03_t26860	IV
	MacYAB2D	Ma03_t32010	IV
	MacYAB2E	Ma04_t03060	IV
	MacYAB2F	Ma04_t29290	IV
	MacYAB2G	Ma04_t37910	IV
	MacYAB2H	Ma06_t32780	IV
	MacYAB2I	Ma07_t01350	IV
	MacFIL1	Ma07_t07140	I
	MacYAB2J	Ma07_t07800	IV
	MacYAB2K	Ma08_t04630	IV
	MacFIL2	Ma08_t11330	I
	MacYAB2L	Ma08_t27340	IV
	MacFIL3	Ma11_t03620	I
	MacFIL4	Ma11_t16020	I
	MacCRC1	Ma01_t17910	III
	MacCRC2	Ma01_t20890	III
	MacCRC3	Ma03_t26490	III
	MacCRC4	Ma04_t01350	III
	MacCRC5	Ma04_t24290	III
	MacCRC6	Ma05_t08630	III
	MacCRC7	Ma06_t26320	III
	MacCRC8	Ma08_t04280	III
Nelumbo nucifera	NnuYAB2A	NNU_09786	IV
	NnuFIL1	NNU_14545	I
	NnuFIL2	NNU_18246	I
	NnuYAB5A	NNU_21688	V
	NnuINO	NNU_21872	II
	NnuYAB2B	NNU_25590	IV
	NnuYAB5B	NNU_26418	V
	NnuCRC1	NNU_04437	III
	NnuCRC2	NNU_07465	III
	NnuFIL3	Nn1g01088	I
Oryza sativassp.Japonica	OsaCRC	LOC_Os03g11600	III
	OsaFIL1	LOC_Os02g42950	I
	OsaFIL2	LOC_Os04g45330	I
	OsaFIL3	LOC_Os10g36420	I
	OsaINO	LOC_Os07g38410	II
	OsaYAB2A	LOC_Os03g44710	IV
	OsaYAB2B	LOC_Os07g06620	IV
	OsaYAB2C	LOC_Os12g42610	IV
Ostreococcus lucimarinus	OluYAB1	15490
Populus trichocarpa	PtrINO1	Potri.008G189000	II
	PtrINO2	Potri.010G042400	II
	PtrFIL1	Potri.001G120200	I
	PtrYAB2A	Potri.001G214700	IV
	PtrFIL2	Potri.002G145100	I
	PtrFIL3	Potri.003G112800	I
	PtrYAB5A	Potri.006G067800	V
	PtrYAB2B	Potri.009G000100	IV
	PtrFIL4	Potri.014G066700	I
	PtrYAB2C	Potri.016G067300	IV
	PtrYAB5B	Potri.018G129800	V
	PtrCRC1	Potri.008G097800	III
	PtrCRC2	Potri.010G154350	III
Picea abies	PabYAB2_5A	PAB00011805	VI
	PabYAB2_5B	PAB00018765	VI
	PabYAB2_5D	PAB00040617	VI
Pseudotsuga menziesii	PmeYAB2_5A1	PME00021191	VI
	PmeYAB2_5A2	PME00123761	VI
	PmeYAB2_5D	PME00002912	VI
Picea glauca	PglYAB2_5A1	PGL00006748	VI
	PglYAB2_5B	PGL00010847	VI
	PglYAB2_5A2	PGL00026416	VI
	PglYAB2_5D	PGL00005882	VI
Pinus pinaster	PpiYAB2_5B	PPI00004777	VI
	PpiYAB2_5A1	PPI00005938	VI
	PpiYAB2_5A2	PPI00051080	VI
	PpiYAB2_5A3	PPI00057715	VI
	PpiYAB2_5D	PPI00019206	VI
Picea sitchensis	PsiYAB2_5A1	PSI00004127	VI
	PsiYAB2_5A2	PSI00004745	VI
	PsiYAB2_5B	PSI00015742	VI
	PsiYAB2_5A3	PSI00018287	VI
	PsiYAB2_5D	PSI00002622	VI
Pinus sylvestris	PsyYAB2_5A1	PSY00025518	VI
	PsyYAB2_5A2	PSY00025519	VI
	PsyYAB2_5B	PSY00032280	VI
Pinus taeda	PtaYAB2_5B	PTA00017126	VI
	PtaYAB2_5A1	PTA00021655	VI
	PtaYAB2_5D	PTA00032362	VI
	PtaYAB2_5A2	PTA00064975	VI
	PtaYAB2_5A3	PTA00074819	VI
Sequoiadendron giganteum	SgiYAB2_5C	SEGI_10231	VI
	SgiYAB2_5B	SEGI_22233	VI
	SgiYAB2_5A	SEGI_37225	VI
	SgiYAB2_5D	SEGI_14550	VI
Sanguinaria canadensis	ScaYAB2	XHKT_scaffold_2003282	IV
Sphagnum magellanicum	SmaYAB1	Sphmag14G083800	VII
Solanum lycopersicum	SlyINO	Solyc05g005240	II
	SlyFIL1	Solyc01g091010	I
	SlyYAB2A	Solyc06g073920	IV
	SlyYAB5A	Solyc07g008180	V
	SlyFIL2	Solyc08g079100	I
	SlyYAB2B	Solyc11g071810	IV
	SlyYAB5B	Solyc12g009580	V
	SlyCRC1	Solyc01g010240	III
	SlyCRC2	Solyc05g012050	III
Thuja plicata	TplYAB2_5B1	Thupl.29378920s0014	VI
	TplYAB2_5D	Thupl.29377238s0018	VI
	TplYAB2_5B2	Thupl.29378920s0014	VI
	TplYAB2_5A	Thupl.29345366s0001	VI
	TplYAB2_5C1	Thupl.29381866s0003	VI
	TplYAB2_5C2	Thupl.29381866s0004	VI
Taxus baccata	TbaYAB2_5A	TBA00005603	VI
	TbaYAB2_5C1	TBA00027668	VI
	TbaYAB2_5C2	TBA00029474	VI
Vitis vinifera	VviINO	GSVIVG01013778001	II
	VviCRC	GSVIVG01012246001	III
	VviFIL1	GSVIVG01001269001	I
	VviYAB5	GSVIVG01015567001	V
	VviYAB2A	GSVIVG01022586001	IV
	VviFIL2	GSVIVG01027648001	I
	VviYAB2B	GSVIVG01037533001	IV
Welwitschia mirabilis	WmiYAB2_5A1	W.mirabilis.17972	VI
	WmiYAB1A	W.mirabilis.19756	VII
	WmiYAB2_5D	W.mirabilis.07667	VI
	WmiYAB1B	W.mirabilis.01107	VII
Zea mays	ZmaCRC1	Zm00001d028216	III
	ZmaCRC2	Zm00001d048083	III
	ZmaFIL1	Zm00001d002829	I
	ZmaYAB2B	Zm00001d013662	IV
	ZmaFIL2	Zm00001d013895	I
	ZmaYAB2D	Zm00001d018829	IV
	ZmaINO	Zm00001d021863	II
	ZmaFIL3	Zm00001d025944	I
	ZmaYAB2E	Zm00001d031109	IV
	ZmaFIL4	Zm00001d032502	I
	ZmaYAB2G	Zm00001d041277	IV
	ZmaFIL5	Zm00001d017391	I

## Sheet: KAN
Species	Name	Locus	Group
Arabidopsis thaliana	AtKAN1	AT5G16560	I
	AtKAN2	AT1G32240	II
	AtKAN3	AT4G17695	II
	AtATS/KAN4	AT5G42630	III
Abies alba	AalKAN_A1	AALBA5B205512P1	IV
	AalKAN_A2	AALBA5B688499P1 partial_cds	IV
	AalKAN_B1	AALBA5B245981P1	V
	AalKAN_B2	AALBA5B804870P2	V
	AalKAN_B3	AALBA5B868036P1	V
Anthoceros angustus	AanKAN1	AANG006052
Anthoceros agrestis	AagKAN1	AagrOXF_evm.model.utg000022l.24.1
Anthoceros punctatus	ApuKAN1	Apun_evm.model.utg000045l.81.1
Amborella trichopoda	AtrATS	ATR0733G134	III
	AtrKAN1	ATR0598G215	I
	AtrKAN2	ATR0829G065	II
Azolla filiculoides	AfiATS1	Azfi_s0401.g068282	III
	AfiKAN4	Azfi_s0899.g091749
Brachypodium distachyon	BdiATS1	Bradi1g07511	III
	BdiATS2	Bradi1g14480	III
	BdiATS3	Bradi3g00550
	BdiKAN1A	Bradi4g29700	I
	BdiKAN1B	Bradi3g36260	I
	BdiKAN2A	Bradi3g16340	II
	BdiKAN2B	Bradi3g52320	II
Beta vulgaris	BvuATS	Bv1_012890_mdoq	III
	BvuKAN2	Bv5_106980_jzcm	II
Ceratophyllum demersum	CdeATS1	EVM_x001C_gene_prefix04195	III
	CdeATS2	EVM_x001C_gene_prefix08609	III
	CdeKAN1A	EVM_x001C_gene_prefix08076	I
	CdeKAN1B	EVM_x001C_gene_prefix09751	I
	CdeKAN1C	EVM_x001C_gene_prefix14924	I
	CdeKAN1D	EVM_x001C_gene_prefix17564	I
	CdeKAN2A	EVM_x001C_gene_prefix06086	II
	CdeKAN2B	EVM_x001C_gene_prefix15399	II
	CdeKAN2C	EVM_x001C_gene_prefix19393	II
	CdeKAN2D	EVM_x001C_gene_prefix21578	II
	CdeKAN2E	EVM_x001C_gene_prefix22660	II
Ceratopteris richardii	CriATS1	Ceric.13G021000	III
Ceratodon purpureus	CpuKAN_A1	CepurGG1.3G069600	VI
	CpuKAN_A2	CepurGG1.12G113000	VI
	CpuKAN_A3	CepurGG1.9G078400	VI
Coffea canephora	CcaATS	Cc10_g03650	III
	CcaKAN1	Cc07_g13030	I
	CcaKAN2	Cc08_g03280	II
	CcaKAN3	Cc08_g03290	II
Cycas micholitzii	CmiKAN_B1	scaffold-XZUY-2008401-Cycas_micholitzii	V
Daucus carota	DcaATS	DCAR_020944	III
	DcaKAN2A	DCAR_004273	II
	DcaKAN2B	DCAR_008227	II
	DcaKAN2C	DCAR_020413	II
	DcaKAN3	DCAR_012761
	DcaKAN4	DCAR_014150
Euryale ferox	EfeATS1	g04569.t1	III
	EfeATS2	g17072.t1	III
	EfeATS3	g30677.t1	III
	EfeKAN1A	g01696.t1	I
	EfeKAN1B	g07757.t1	I
	EfeKAN1C	g17362.t1	I
	EfeKAN1D	g24067.t1	I
	EfeKAN1E	g29279.t1	I
	EfeKAN1F	g32127.t1	I
	EfeKAN2A	g08191.t1	II
	EfeKAN2B	g12870.t2	II
	EfeKAN2C	g13538.t1	II
	EfeKAN2D	g13813.t1	II
	EfeKAN2E	g16174.t2	II
	EfeKAN2F	g37105.t1	II
Fragaria vesca	FveATS	FVE15055	III
	FveKAN1	FVE09331	I
	FveKAN2	FVE13743	II
Ginkgo biloba	GbiKAN_A1	Gb_01374	IV
	GbiKAN_A2	Gb_17469	IV
	GbiKAN_B1	Gb_08427	V
	GbiKAN_B2	Gb_17437	V
Gnetum montanum	GmoATS1	TnS000963785t02	III
	GmoKAN_A1	TnS000197697t09	IV
	GmoKAN_A2	TnS000819183t01	IV
	GmoKAN_B1	TnS000507375t26	V
Glycine max	GmaATS1	Glyma.04G035700	III
	GmaATS2	Glyma.06G035700	III
	GmaATS3	Glyma.14G079000	III
	GmaATS4	Glyma.17G246200	III
	GmaKAN1A	Glyma.02G242100	I
	GmaKAN1B	Glyma.07G106800	I
	GmaKAN1C	Glyma.09G171100	I
	GmaKAN1D	Glyma.14G211900	I
	GmaKAN1E	Glyma.18G043000	I
	GmaKAN1F	Glyma.11G213700	I
	GmaKAN2A	Glyma.01G014800	II
	GmaKAN2B	Glyma.09G207300	II
Marchantia polymorpha	MpoKAN_A1	Mapoly0022s0032	VI
Musa acuminata	MacATS1	Ma02_g15190	III
	MacATS2	Ma04_g29700	III
	MacATS3	Ma04_g38940	III
	MacATS4	Ma07_g00670	III
	MacATS5	Ma10_g28630	III
	MacKAN1A	Ma01_g15530	I
	MacKAN1B	Ma02_g08650	I
	MacKAN1C	Ma07_g02380	I
	MacKAN1D	Ma08_g23600	I
	MacKAN1E	Ma08_g31220	I
	MacKAN1F	Ma11_g11580	I
	MacKAN2A	Ma00_g01870	II
	MacKAN2B	Ma01_g01580	II
	MacKAN2C	Ma01_g18490	II
	MacKAN2D	Ma02_g19750	II
	MacKAN2E	Ma03_g00300	II
	MacKAN2F	Ma03_g14050	II
	MacKAN2G	Ma04_g04550	II
	MacKAN2H	Ma04_g16790	II
	MacKAN2I	Ma09_g23750	II
	MacKAN2J	Ma10_g07550	II
	MacKAN23	Ma11_g16460
Nelumbo nucifera	NnuATS1	Nn5g29410	III
	NnuATS2	Nn6g32146	III
	NnuKAN1A	Nn4g24524	I
	NnuKAN1B	Nn3g18456	I
	NnuKAN2	Nn1g00197	II
	NnuKAN3	Nn3g19401	II
Oryza sativassp.Japonica	OsaATS1	LOC_Os03g55760	III
	OsaATS2	LOC_Os03g42569	III
	OsaKAN1A	LOC_Os08g33050	I
	OsaKAN1B	LOC_Os09g23200	I
	OsaKAN2A	LOC_Os02g46940	II
	OsaKAN2B	LOC_Os08g06370	II
Physcomitrella patens	PpaKAN_A1	Pp3c20_7050	VI
	PpaKAN_A2	Pp3c23_19680	VI
	PpaKAN_A3	Pp3c8_16910	VI
Picea abies	PabKAN_A1	PAB00002722	IV
	PabKAN_A2	PAB00022980	IV
	PabKAN_A3	PAB00050389	IV
	PabKAN_B1	PAB00012384	V
	PabKAN_B2	PAB00059890	V
Populus trichocarpa	PtrATS1	Potri.002G130200	III
	PtrATS2	Potri.014G037200	III
	PtrKAN1A	Potri.004G082400	I
	PtrKAN1B	Potri.012G042100	I
	PtrKAN1C	Potri.015G031600	I
	PtrKAN1D	Potri.017G137600	I
	PtrKAN2	Potri.001G137600	II
	PtrKAN3	Potri.003G096300	II
Pseudotsuga menziesii	PmeKAN_A1	PME00015962	IV
	PmeKAN_A2	PME00017169	IV
	PmeKAN_A3	PME00085329	IV
	PmeKAN_B1	PME00000843	V
	PmeKAN_B2	PME00126283	V
Picea glauca	PglKAN_A1	PGL00011956	IV
	PglKAN_A2	PGL00019869	IV
Pinus pinaster	PpiKAN_A1	PPI00016748	IV
	PpiKAN_A2	PPI00048334	IV
	PpiKAN_A3	PPI00067358	IV
	PpiKAN_A4	PPI00019014	IV
	PpiKAN_B1	PPI00009925	V
	PpiKAN_B2	PPI00012147	V
Pinus sylvestris	PsyKAN_A1	PSY00015921	IV
	PsyKAN_A2	PSY00023407	IV
	PsyKAN_A3	PSY00031939	IV
	PsyKAN_B1	PSY00017941	V
Picea sitchensis	PsiKAN_B1	PSI00013883	V
	PsiKAN_B2	PSI00018550	V
Pinus taeda	PtaKAN_A1	PTA00019593	IV
	PtaKAN_A2	PTA00023613	IV
	PtaKAN_B1	PTA00084337	V
Selaginella moellendorffii	SmoATS1	gene13957	III
	SmoATS2	gene4589	III
	SmoKAN3	gene26094
Salvinia cucullata	ScuATS1	Sacu_v1.1_s0013.g005961	III
	ScuATS2	Sacu_v1.1_s0030.g010288	III
	ScuKAN3	Sacu_v1.1_s0015.g006600
Sequoiadendron giganteum	SgiKAN_A1	SEGI_22171	IV
	SgiKAN_B1	SEGI_33174	V
Solanum lycopersicum	SlyATS	Solyc04g079600	III
	SlyKAN1A	Solyc05g051060	I
	SlyKAN1B	Solyc11g011770	I
	SlyKAN2A	Solyc06g066340	II
	SlyKAN2B	Solyc08g005260	II
	SlyKAN2C	Solyc08g076400	II
Sphagnum fallax	SfaKAN_A1	Sphfalx02G193200	VI
	SfaKAN_A2	Sphfalx05G064800	VI
	SfaKAN_A3	Sphfalx01G181000	VI
	SfaKAN_A4	Sphfalx01G007100	VI
Sphagnum magellanicum	SmaKAN_A1	Sphmag02G195600	VI
	SmaKAN_A2	Sphmag05G072200	VI
	SmaKAN_A3	Sphmag01G119800	VI
	SmaKAN_A4	Sphmag01G004300	VI
Taxus baccata	TbaKAN_A1	TBA00011632	IV
	TbaKAN_A2	TBA00013907	IV
Thuja plicata	TplKAN_A1	Thupl.29379176s0005	IV
	TplKAN_A2	Thupl.29377929s0011	IV
	TplKAN_B1	Thupl.29379035s0003	V
Vitis vinifera	VviATS	GSVIVG01009589001	III
	VviKAN1	GSVIVG01026319001	I
	VviKAN2	GSVIVG01013085001	II
	VviKAN3	GSVIVG01024383001	II
Welwitschia mirabilis	WmiATS1	W.mirabilis.01269	III
	WmiATS2	W.mirabilis.04454	III
	WmiKAN_A1	W.mirabilis.15437	IV
	WmiKAN_A2	W.mirabilis.25801	IV
Zea mays	ZmaATS1	Zm00001d013187	III
	ZmaATS2	Zm00001d034181	III
	ZmaATS3	Zm00001d033310	III
	ZmaATS4	Zm00001d041377	III
	ZmaKAN1A	Zm00001d020384	I
	ZmaKAN1B	Zm00001d032249	I
	ZmaKAN1C	Zm00001d050350	I
	ZmaKAN2A	Zm00001d051527	II
	ZmaKAN2B	Zm00001d017702	II
	ZmaKAN2C	Zm00001d049511	II
	ZmaKAN2D	Zm00001d024532	II

## Sheet: ETT
Species	Name	Accession number	Group
Arabidopsis thaliana	AtARF1	AT1G59750	I1
	AtARF2	AT5G62000	I3
	AtARF3_ETT	AT2G33860	II1
	AtARF4	AT5G60450	II2
	AtARF5_MP	AT1G19850	III1
	AtARF6	AT1G30330	III3
	AtARF7	AT5G20730	III2
	AtARF8	AT5G37020	III4
	AtARF9	AT4G23980	I2
	AtARF10	AT2G28350	IV1
	AtARF11	AT2G46530	I2
	AtARF12	AT1G34310	I2
	AtARF13	AT1G34170	I2
	AtARF14	AT1G35540	I2
	AtARF15	AT1G35520	I2
	AtARF16	AT4G30080	IV1
	AtARF17	AT1G77850	IV2
	AtARF18	AT3G61830	I2
	AtARF19	AT1G19220	III2
	AtARF20	AT1G35240	I2
	AtARF21	AT1G34410	I2
	AtARF22	AT1G34390	I2
	AtARF23	AT1G43950	I2
Abies alba	AalARF10_16A	AALBA5B877515P1	IV1
	AalARF10_16B	AALBA5B892597P1	IV1
	AalARF10_16C	AALBA5B953260P1	IV1
	AalARF6_8A	AALBA5B449476P1	III5
	AalARF6_8B	AALBA5B708514P1 partial_cds	III5
	AalETT	AALBA5B131017P1	II3
	AalMP	AALBA5B104379P1 partial_cds	III5
Anthoceros angustus	AanARF6_8A	AANG012813	III5
	AanARF10_16A	AANG000742	IV1
	AanARF10_16B	AANG000743	IV1
	AanARF10_16C	AANG012642	IV1
Anthoceros agrestis	AagARF10_16A	AagrOXF_evm.model.utg000006l.365.1	IV1
	AagARF10_16B	AagrOXF_evm.model.utg000069l.94.1	IV1
	AagARF10_16C	AagrOXF_evm.model.utg000069l.95.1	IV1
	AagARF6_8A	AagrOXF_evm.model.utg000126l.206.1	III5
Anthoceros punctatus	ApuARF6_8A	Apun_evm.model.utg000045l.202.1	III5
	ApuARF10_16A	Apun_evm.model.utg000089l.87.1	IV1
	ApuARF10_16B	Apun_evm.model.utg000089l.88.1	IV1
	ApuARF10_16C	Apun_evm.model.utg000144l.74.1	IV1
Amborella trichopoda	AtrARF10_16A	ATR0048G071	IV1
	AtrARF10_16B	ATR0165G024	IV1
	AtrARF17A	ATR0165G043	IV2
	AtrARF17B	ATR0584G248	IV2
	AtrARF2A	ATR0582G007	I3
	AtrARF2B	ATR0706G048	I3
	AtrARF6	ATR1098G065	III3
	AtrARF7A	ATR0626G378	III2
	AtrARF7B	ATR0681G058	III2
	AtrARF8	ATR0618G147	III4
	AtrARF9	ATR0602G278	I2
	AtrETT	ATR0602G042	II1
	AtrMP	ATR0910G003	III1
Azolla filiculoides	AfiARF1_2_9A	Azfi_s0007.g010679	I4
	AfiARF1_2_9B	Azfi_s0011.g012740	I4
	AfiARF1_2_9C	Azfi_s0092.g043051	I4
	AfiARF1_2_9D	Azfi_s0271.g061201	I4
	AfiARF1_2_9E	Azfi_s0390.g067670	I4
	AfiARF10_16A	Azfi_s0002.g001367	IV1
	AfiARF10_16B	Azfi_s0013.g013413	IV1
	AfiARF10_16C	Azfi_s0019.g015120	IV1
	AfiARF10_16D	Azfi_s0099.g044147	IV1
	AfiARF10_16E	Azfi_s0697.g082598	IV1
	AfiARF6_8A	Azfi_s0038.g026103	III5
	AfiARF6_8B	Azfi_s0185.g056651	III5
	AfiARF6_8C	Azfi_s0384.g067487	III5
	AfiETT	Azfi_s0006.g010141	II3
	AfiMP1	Azfi_s0005.g009155	III5
	AfiMP2	Azfi_s0129.g048848	III5
	AfiMP3	Azfi_s0433.g069577	III5
	AfiMP4	Azfi_s0934.g093100	III5
Beta vulgaris	BvuARF1	Bv6_145940_kddw	I1
	BvuARF10_16A	Bv2_047650_jrpi	IV1
	BvuARF10_16B	Bv7_161770_eqms	IV1
	BvuARF17	Bv1_000500_ghtj	IV2
	BvuARF2	Bv5_113390_yzaj	I3
	BvuARF4	Bv9_208190_efdx	II2
	BvuARF6	Bv9_203750_gcik	III3
	BvuARF7A	Bv2_035870_qfwi	III2
	BvuARF7B	Bv8_190650_zzhs	III2
	BvuARF8	Bv4_084470_okdq	III4
	BvuARF9A	Bv1_002880_qzmp	I2
	BvuARF9B	Bv5_125780_orwr	I2
	BvuETT	Bv8_182410_opag	II1
	BvuMP	Bv1_022070_hgze	III1
Brachypodium distachyon	BdiARF10_16A	Bradi1g33160	IV1
	BdiARF10_16B	Bradi3g28950	IV1
	BdiARF10_16C	Bradi3g49320	IV1
	BdiARF10_16D	Bradi5g15904	IV1
	BdiARF17A	Bradi1g12477	IV2
	BdiARF17B	Bradi2g21264	IV2
	BdiARF17C	Bradi5g27400	IV2
	BdiARF1A	Bradi3g45880	I1
	BdiARF1B	Bradi5g10950	I1
	BdiARF2A	Bradi2g59480	I3
	BdiARF2B	Bradi4g07470	I3
	BdiARF2C	Bradi4g17410	I3
	BdiARF6A	Bradi1g32547	III3
	BdiARF6B	Bradi3g04920	III3
	BdiARF6C	Bradi4g01730	III3
	BdiARF7A	Bradi1g34340	III2
	BdiARF7B	Bradi1g46602	III2
	BdiARF7C	Bradi3g03407	III2
	BdiARF7D	Bradi3g40437	III2
	BdiARF8	Bradi5g25767	III4
	BdiARF9	Bradi2g08120	I2
	BdiETT1	Bradi2g16610	II1
	BdiETT2	Bradi2g19867	II1
	BdiETT3	Bradi2g46190	II1
	BdiETT4	Bradi2g50120	II1
	BdiMP	Bradi5g25157	III1
	BdiARF17D	Bradi1g12476	IV2
Coffea canephora	CcaARF1	Cc02_g23570	I1
	CcaARF10_16A	Cc01_g11020	IV1
	CcaARF10_16B	Cc02_g11300	IV1
	CcaARF10_16C	Cc06_g03950	IV1
	CcaARF2A	Cc00_g12260	I3
	CcaARF2B	Cc03_g11270	I3
	CcaARF6A	Cc05_g00510	III3
	CcaARF6B	Cc09_g08740	III3
	CcaARF7A	Cc00_g00210	III2
	CcaARF7B	Cc06_g12540	III2
	CcaARF8	Cc07_g12410	III4
	CcaARF9A	Cc02_g39520	I2
	CcaARF9B	Cc08_g16330	I2
	CcaARF4	Cc01_g11410	II2
	CcaETT	Cc02_g14070	II1
	CcaMP	Cc10_g01900	III1
Ceratopteris richardii	CriARF1_2_9A	Ceric.03G061000	I4
	CriARF1_2_9B	Ceric.18G060100	I4
	CriARF1_2_9C	Ceric.20G087500	I4
	CriARF1_2_9D	Ceric.28G004000	I4
	CriARF10_16A	Ceric.03G049600	IV1
	CriARF10_16B	Ceric.07G060200	IV1
	CriARF10_16C	Ceric.18G034300	IV1
	CriARF10_16D	Ceric.30G068500	IV1
	CriARF10_16E	Ceric.32G056500	IV1
	CriARF6_8A	Ceric.10G078200	III5
	CriARF6_8B	Ceric.29G070000	III5
	CriARF6_8C	Ceric.35G054000	III5
	CriETT	Ceric.21G089900	II3
	CriMP	Ceric.30G022300	III5
Ceratodon purpureus	CpuARF10_16A	CepurGG1.1G199300	IV1
	CpuARF6_8A	CepurGG1.1G025600	III5
	CpuARF6_8B	CepurGG1.2G199800	III5
	CpuARF6_8C	CepurGG1.6G024100	III5
	CpuARF6_8D	CepurGG1.9G104900	III5
	CpuETT	CepurGG1.5G068400	II4
Chlorokybus atmophyticus	CatARF	Chrsp158S02297	V
Cycas micholitzii	CmiARF6_8A	scaffold-XZUY-2003279-Cycas_micholitzii	III5
	CmiARF6_8B	scaffold-XZUY-2003280-Cycas_micholitzii	III5
	CmiARF2A	scaffold-XZUY-2006786-Cycas_micholitzii	I3
	CmiARF2B	scaffold-XZUY-2007534-Cycas_micholitzii	I3
	CmiARF2C	scaffold-XZUY-2012685-Cycas_micholitzii	I3
Euryale ferox	EfeARF10_16A	g05952.t1	IV1
	EfeARF10_16B	g25623.t1	IV1
	EfeARF10_16C	g28178.t5	IV1
	EfeARF10_16D	g32720.t1	IV1
	EfeARF10_16E	g32746.t1	IV1
	EfeARF10_16F	g38826.t1	IV1
	EfeARF17A	g26790.t1	IV2
	EfeARF17B	g37199.t1	IV2
	EfeARF17C	g38223.t1	IV2
	EfeARF2A	g03971.t1	I3
	EfeARF2B	g15286.t1	I3
	EfeARF2C	g16384.t1	I3
	EfeARF2D	g18764.t1	I3
	EfeARF2E	g19888.t3	I3
	EfeARF2F	g22850.t2	I3
	EfeARF2G	g23110.t1	I3
	EfeARF2H	g30167.t1	I3
	EfeARF2I	g32188.t1	I3
	EfeARF4A	g00619.t4	II2
	EfeARF4B	g01952.t1	II2
	EfeARF4C	g27825.t1	II2
	EfeARF6A	g02321.t1	III3
	EfeARF6B	g05944.t1	III3
	EfeARF7A	g02716.t2	III2
	EfeARF7B	g04950.t1	III2
	EfeARF7C	g06091.t2	III2
	EfeARF7D	g10809.t1	III2
	EfeARF7E	g11017.t1	III2
	EfeARF7F	g19476.t1	III2
	EfeARF7G	g20132.t1	III2
	EfeARF7H	g32426.t4	III2
	EfeARF7I	g38676.t1	III2
	EfeARF8A	g17752.t3	III4
	EfeARF8B	g19227.t1	III4
	EfeARF8C	g33311.t1	III4
	EfeARF9A	g04988.t1	I2
	EfeARF9B	g10733.t1	I2
	EfeARF9C	g11850.t1	I2
	EfeARF9D	g30453.t1	I2
	EfeARF9E	g33923.t1	I2
	EfeETT1	g28592.t1	II1
	EfeETT2	g29726.t1	II1
	EfeETT3	g31740.t1	II1
	EfeMP1	g17783.t1	III1
	EfeMP2	g19252.t1	III1
	EfeMP3	g33339.t1	III1
Fragaria vesca	FveARF1	FVE29255	I1
	FveARF10_16A	FVE09733	IV1
	FveARF10_16B	FVE16844	IV1
	FveARF10_16C	FVE23280	IV1
	FveARF17A	FVE02234	IV2
	FveARF17B	FVE16050	IV2
	FveARF2A	FVE06434	I3
	FveARF2B	FVE27792	I3
	FveARF4	FVE28545	II2
	FveARF6A	FVE22728	III3
	FveARF6B	FVE30394	III3
	FveARF7A	FVE12224	III2
	FveARF7B	FVE12917	III2
	FveARF8	FVE31631	III4
	FveARF9A	FVE25123	I2
	FveARF9B	FVE38435	I2
	FveETT	FVE29771	II1
	FveMP	FVE08492	III1
Ginkgo biloba	GbiARF10_16A	Gb_25507	IV1
	GbiARF10_16B	Gb_33804	IV1
	GbiARF10_16C	Gb_39786	IV1
	GbiARF2A	Gb_12414	I3
	GbiARF2B	Gb_18738	I3
	GbiARF2C	Gb_23186	I3
	GbiARF2D	Gb_23328	I3
	GbiARF6_8A	Gb_32864	III5
	GbiARF6_8B	Gb_39685	III5
	GbiMP	Gb_02925	III1
	GbiARF7	Gb_25606	III2
	GbiETT1	Gb_15247	II3
	GbiETT2	Gb_17830	II3
	GbiETT3	Gb_31132	II3
	GbiETT4	Gb_32404	II3
Gnetum montanum	GmoARF10_16A	TnS000006441t03	IV1
	GmoARF10_16B	TnS000332527t09	IV1
	GmoARF2A	TnS000084833t11	I3
	GmoARF2B	TnS000811647t03	I3
	GmoARF6_8A	TnS000936593t02	III5
	GmoARF6_8B	TnS000060703t05	III5
	GmoARF6_8C	TnS000138797t02	III5
	GmoARF7	TnS000015975t02	III2
	GmoETT1	TnS000141003t01	II3
	GmoETT2	TnS000426595t04	II3
	GmoMP1	TnS000522447t03	III1
	GmoMP2	TnS000522447t02	III1
Glycine max	GmaARF10_16A	Glyma.10G053500	IV1
	GmaARF10_16B	Glyma.10G210600	IV1
	GmaARF10_16C	Glyma.11G145500	IV1
	GmaARF10_16D	Glyma.12G076200	IV1
	GmaARF10_16E	Glyma.12G174100	IV1
	GmaARF10_16F	Glyma.13G140600	IV1
	GmaARF10_16G	Glyma.13G325200	IV1
	GmaARF10_16H	Glyma.19G181900	IV1
	GmaARF10_16I	Glyma.20G180000	IV1
	GmaARF17A	Glyma.13G084700	IV2
	GmaARF17B	Glyma.14G166500	IV2
	GmaARF17C	Glyma.04G254200	IV2
	GmaARF1A	Glyma.07G272800	I1
	GmaARF1B	Glyma.12G164100	I1
	GmaARF1C	Glyma.16G000300	I1
	GmaARF2A	Glyma.03G208800	I3
	GmaARF2B	Glyma.04G200600	I3
	GmaARF2C	Glyma.05G200800	I3
	GmaARF2D	Glyma.06G164900	I3
	GmaARF2E	Glyma.08G008100	I3
	GmaARF2F	Glyma.19G206100	I3
	GmaARF4A	Glyma.12G071000	II2
	GmaARF4B	Glyma.12G171000	II2
	GmaARF4C	Glyma.13G328000	II2
	GmaARF4D	Glyma.U019800	II2
	GmaARF6A	Glyma.05G143800	III3
	GmaARF6B	Glyma.08G100100	III3
	GmaARF6C	Glyma.13G221400	III3
	GmaARF6D	Glyma.14G032700	III3
	GmaARF6E	Glyma.15G091000	III3
	GmaARF6F	Glyma.02G281700	III3
	GmaARF7A	Glyma.01G002100	III2
	GmaARF7B	Glyma.05G221300	III2
	GmaARF7C	Glyma.07G130400	III2
	GmaARF7D	Glyma.08G027800	III2
	GmaARF7E	Glyma.09G072200	III2
	GmaARF7F	Glyma.13G112600	III2
	GmaARF7G	Glyma.15G181000	III2
	GmaARF7H	Glyma.17G047100	III2
	GmaARF8A	Glyma.02G239600	III4
	GmaARF8B	Glyma.11G204200	III4
	GmaARF8C	Glyma.14G208500	III4
	GmaARF8D	Glyma.18G046800	III4
	GmaARF9A	Glyma.01G103500	I2
	GmaARF9B	Glyma.03G070500	I2
	GmaARF9C	Glyma.03G258300	I2
	GmaARF9D	Glyma.07G054800	I2
	GmaARF9E	Glyma.07G134800	I2
	GmaARF9F	Glyma.16G023600	I2
	GmaARF9G	Glyma.18G184500	I2
	GmaETT1	Glyma.07G202200	II1
	GmaETT2	Glyma.13G174000	II1
	GmaETT3	Glyma.13G234200	II1
	GmaETT4	Glyma.15G078800	II1
	GmaMP1	Glyma.14G217700	III1
	GmaMP2	Glyma.17G256500	III1
Marchantia polymorpha	MpoETT	Mapoly0011s0167	II4
	MpoARF6_8A	Mapoly0019s0045	III5
	MpoARF6_8B	Mapoly0160s0029	III5
	MpoARF10_16A	Mapoly0043s0098	IV1
Nelumbo nucifera	NnuARF1	Nn5g27207	I1
	NnuARF10_16A	Nn2g10814	IV1
	NnuARF10_16B	Nn2g13111	IV1
	NnuARF17A	Nn5g27939	IV2
	NnuARF17B	Nn1g08508	IV2
	NnuARF2A	Nn3g16295	I3
	NnuARF2B	Nn4g26050	I3
	NnuARF2C	Nn4g22158	I3
	NnuARF2D	Nn3g21274	I3
	NnuARF4A	Nn2g10724	II2
	NnuARF4B	Nn2g13036	II2
	NnuARF6A	Nn4g26643	III3
	NnuARF7A	Nn6g35662	III2
	NnuARF7B	Nn3g19236	III2
	NnuARF7C	Nn2g16022	III2
	NnuARF7D	Nn8g41104	III2
	NnuARF7E	Nn2g12781	III2
	NnuARF8	Nn3g18712	III4
	NnuARF9A	Nn3g18963	I2
	NnuARF9B	Nn1g00275	I2
	NnuETT1	Nn3g21689	II1
	NnuETT2	Nn1g04271	II1
	NnuMP1	Nn6g32307	III1
	NnuMP2	Nn5g29278	III1
	NnuARF7F	Nn8g38570	III2
	NnuARF7G	Nn2g16022	III2
	NnuETT3	Nn1g06381	II1
	NnuARF6B	Nn3g20321	III3
Oryza sativa	OsaARF10_16A	LOC_Os02g41800	IV1
	OsaARF10_16B	LOC_Os04g43910	IV1
	OsaARF10_16C	LOC_Os06g47150	IV1
	OsaARF10_16D	LOC_Os10g33940	IV1
	OsaARF17A	LOC_Os07g08520	IV2
	OsaARF17B	LOC_Os07g08600	IV2
	OsaARF17C	LOC_Os04g59430	IV2
	OsaARF17D	LOC_Os07g08540	IV2
	OsaARF1A	LOC_Os02g35140	I1
	OsaARF1B	LOC_Os04g36054	I1
	OsaARF2A	LOC_Os01g70270	I3
	OsaARF2B	LOC_Os11g32110	I3
	OsaARF2C	LOC_Os12g29520	I3
	OsaARF6A	LOC_Os02g06910	III3
	OsaARF6B	LOC_Os06g46410	III3
	OsaARF6C	LOC_Os12g41950	III3
	OsaARF7A	LOC_Os02g04810	III2
	OsaARF7B	LOC_Os06g09660	III2
	OsaARF7C	LOC_Os06g48950	III2
	OsaARF7D	LOC_Os08g40900	III2
	OsaARF8	LOC_Os04g57610	III4
	OsaARF9	LOC_Os01g13520	I2
	OsaETT1	LOC_Os01g48060	II1
	OsaETT2	LOC_Os05g43920	II1
	OsaETT3	LOC_Os05g48870	II1
	OsaETT4	LOC_Os01g54990	II1
	OsaMP	LOC_Os04g56850	III1
Physcomitrella patens	PpaARF10_16A	Pp3c4_12970	IV1
	PpaARF10_16B	Pp3c4_13010	IV1
	PpaARF10_16C	Pp3c6_26890	IV1
	PpaARF6_8A	Pp3c13_4720	III5
	PpaARF6_8B	Pp3c14_16990	III5
	PpaARF6_8C	Pp3c17_19900	III5
	PpaARF6_8D	Pp3c1_14440	III5
	PpaARF6_8E	Pp3c1_14480	III5
	PpaARF6_8F	Pp3c1_40270	III5
	PpaARF6_8G	Pp3c26_11550	III5
	PpaARF6_8H	Pp3c2_25890	III5
	PpaETT1	Pp3c16_6100	II4
	PpaETT2	Pp3c27_60	II4
	PpaETT3	Pp3c5_9420	II4
	PpaETT4	Pp3c6_21370	II4
Picea abies	PabARF10_16A	PAB00033143	IV1
	PabARF10_16B	PAB00033868	IV1
	PabARF10_16C	PAB00065680	IV1
	PabARF2A	PAB00012050	I3
	PabARF2B	PAB00040466	I3
	PabARF2C	PAB00062305	I3
	PabARF6_8A	PAB00001149	III5
	PabARF6_8B	PAB00026303	III5
	PabMP	PAB00020544	III1
	PabARF7	PAB00058428	III2
	PabETT1	PAB00010949	II3
	PabETT2	PAB00011828	II3
	PabETT3	PAB00012004	II3
Pseudotsuga menziesii	PmeARF10_16A	PME00002835	IV1
	PmeARF10_16B	PME00012211	IV1
	PmeARF10_16C	PME00050347	IV1
	PmeARF10_16D	PME00112489	IV1
	PmeARF2A	PME00001810	I3
	PmeARF2B	PME00022897	I3
	PmeARF2C	PME00059030	I3
	PmeARF6_8A	PME00007648	III5
	PmeARF6_8B	PME00007650	III5
	PmeARF6_8C	PME00073783	III5
	PmeARF7A	PME00006394	III2
	PmeMP	PME00020898	III1
	PmeARF7B	PME00024366	III2
	PmeETT1	PME00017815	II3
	PmeETT2	PME00020013	II3
	PmeETT3	PME00109502	II3
Picea glauca	PglARF6_8A	PGL00026570	III5
	PglARF10_16A	PGL00005076	IV1
Pinus pinaster	PpiARF10_16A	PPI00070613	IV1
	PpiARF10_16B	PPI00072438	IV1
	PpiARF2A	PPI00065617	I3
	PpiARF2B	PPI00070146	I3
	PpiARF2C	PPI00072027	I3
	PpiARF6_8A	PPI00033369	III5
	PpiARF6_8B	PPI00041807	III5
	PpiARF6_8C	PPI00058768	III5
	PpiMP	PPI00011489	III1
	PpiETT1	PPI00050590	II3
	PpiETT2	PPI00069357	II3
Pinus sylvestris	PsyARF10_16A	PSY00003562	IV1
	PsyARF10_16B	PSY00016455	IV1
	PsyARF10_16C	PSY00022310	IV1
	PsyARF2A	PSY00007660	I3
	PsyARF2B	PSY00008845	I3
	PsyARF2C	PSY00015461	I3
	PsyARF6_8A	PSY00008077	III5
	PsyARF6_8B	PSY00009309	III5
	PsyARF6_8C	PSY00015572	III5
	PsyETT1	PSY00009830	II3
	PsyETT2	PSY00017951	II3
	PsyETT3	PSY00019885	II3
	PsyETT4	PSY00020743	II3
	PsyETT5	PSY00025766	II3
Pinus taeda	PtaARF10_16A	PTA00023539	IV1
	PtaARF10_16B	PTA00035076	IV1
	PtaARF10_16C	PTA00035090	IV1
	PtaARF10_16D	PTA00065773	IV1
	PtaARF10_16E	PTA00072790	IV1
	PtaARF2A	PTA00007355	I3
	PtaARF2B	PTA00029364	I3
	PtaARF2C	PTA00047909	I3
	PtaARF2D	PTA00049100	I3
	PtaARF2E	PTA00084403	I3
	PtaARF6_8A	PTA00003670	III5
	PtaARF6_8B	PTA00084420	III5
	PtaARF7	PTA00025275	III2
	PtaMP	PTA00050581	III1
	PtaETT1	PTA00007176	II3
	PtaETT2	PTA00083357	II3
Populus trichocarpa	PtrARF10A	Potri.004G211700	IV1
	PtrARF10B	Potri.009G014800	IV1
	PtrARF16A	Potri.006G127500	IV1
	PtrARF16B	Potri.008G039000	IV1
	PtrARF16C	Potri.010G223200	IV1
	PtrARF16D	Potri.016G090300	IV1
	PtrARF17A	Potri.002G089900	IV2
	PtrARF17B	Potri.005G171300	IV2
	PtrARF1A	Potri.003G001000	I1
	PtrARF1B	Potri.004G228800	I1
	PtrARF2A	Potri.001G066200	I3
	PtrARF2B	Potri.002G207050	I3
	PtrARF2C	Potri.003G163600	I3
	PtrARF2D	Potri.012G106100	I3
	PtrARF2E	Potri.014G135300	I3
	PtrARF2F	Potri.015G105300	I3
	PtrARF4	Potri.009G011800	II2
	PtrARF6A	Potri.001G358500	III3
	PtrARF6B	Potri.002G055000	III3
	PtrARF6C	Potri.005G207700	III3
	PtrARF6D	Potri.011G091900	III3
	PtrARF7A	Potri.006G077800	III2
	PtrARF7B	Potri.006G138500	III2
	PtrARF7C	Potri.018G063000	III2
	PtrARF7D	Potri.018G145800	III2
	PtrARF8A	Potri.004G078200	III4
	PtrARF8B	Potri.017G141000	III4
	PtrARF9A	Potri.001G088600	I2
	PtrARF9B	Potri.002G172800	I2
	PtrARF9C	Potri.003G142100	I2
	PtrARF9D	Potri.014G100100	I2
	PtrETT1	Potri.004G050150	II1
	PtrETT2	Potri.011G059300	II1
	PtrMP1	Potri.002G024700	III1
	PtrMP2	Potri.005G236700	III1
Picea sitchensis	PsiARF6_8A	PSI00001419	III5
	PsiETT	PSI00005558	II3
Sphagnum fallax	SfaARF10_16A	Sphfalx17G058400	IV1
	SfaARF10_16B	Sphfalx19G032600	IV1
	SfaARF6_8A	Sphfalx04G089600	III5
	SfaARF6_8B	Sphfalx06G049700	III5
	SfaARF6_8C	Sphfalx10G085700	III5
	SfaARF6_8D	Sphfalx11G089200	III5
	SfaARF6_8E	Sphfalx15G023800	III5
	SfaETT1	Sphfalx01G075200	II4
	SfaETT2	Sphfalx02G112600	II4
	SfaETT4	Sphfalx05G070100	II4
Selaginella moellendorffii	SmoETT1	gene2105	II4
	SmoARF6_8A	gene24872	III5
	SmoARF6_8B	gene27426	III5
	SmoARF6_8C	gene28726	III5
	SmoETT2	gene34993	II4
	SmoARF10_16A	gene10164	IV1
	SmoARF10_16B	gene18319	IV1
Salvinia cucullata	ScuARF1_2_9A	Sacu_v1.1_s0002.g001088	I4
	ScuARF1_2_9B	Sacu_v1.1_s0003.g001668	I4
	ScuARF1_2_9C	Sacu_v1.1_s0004.g002378	I4
	ScuARF1_2_9D	Sacu_v1.1_s0024.g008995	I4
	ScuARF1_2_9E	Sacu_v1.1_s0047.g013444	I4
	ScuARF1_2_9F	Sacu_v1.1_s0142.g022838	I4
	ScuARF10_16A	Sacu_v1.1_s0068.g016361	IV1
	ScuARF10_16B	Sacu_v1.1_s0090.g018749	IV1
	ScuARF10_16C	Sacu_v1.1_s0146.g023037	IV1
	ScuARF10_16D	Sacu_v1.1_s0204.g025692	IV1
	ScuARF6_8A	Sacu_v1.1_s0019.g007919	III5
	ScuARF6_8B	Sacu_v1.1_s0032.g010740	III5
	ScuARF6_8C	Sacu_v1.1_s0042.g012712	III5
	ScuETT	Sacu_v1.1_s0095.g019239	II3
Sequoiadendron giganteum	SgiARF10_16A	SEGI_25129	IV1
	SgiARF10_16B	SEGI_26456	IV1
	SgiARF10_16C	SEGI_34262	IV1
	SgiARF2A	SEGI_07221	I3
	SgiARF2B	SEGI_08387	I3
	SgiARF2C	SEGI_09939	I3
	SgiARF2D	SEGI_22520	I3
	SgiARF2F	SEGI_40841	I3
	SgiARF6_8A	SEGI_10259	III5
	SgiARF6_8B	SEGI_27475	III5
	SgiARF6_8C	SEGI_39342	III5
	SgiMP1	SEGI_25125	III1
	SgiMP2	SEGI_28628	III1
	SgiARF7	SEGI_39605	III2
	SgiETT	SEGI_23291	II3
Solanum lycopersicum	SlyARF1	Solyc01g103050	I1
	SlyARF10A	Solyc06g075150	IV1
	SlyARF10B	Solyc11g069500	IV1
	SlyARF16A	Solyc09g007810	IV1
	SlyARF16B	Solyc10g086130	IV1
	SlyARF17	Solyc11g013480	IV2
	SlyARF2A	Solyc03g118290	I3
	SlyARF2B	Solyc12g042070	I3
	SlyARF4	Solyc11g069190	II2
	SlyARF6B	Solyc07g043620	III3
	SlyARF7A	Solyc05g047460	III2
	SlyARF7B	Solyc07g016180	III2
	SlyARF7C	Solyc07g042260	III2
	SlyARF8A	Solyc02g037530	III4
	SlyARF8B	Solyc03g031970	III4
	SlyARF9A	Solyc01g096070	I2
	SlyARF9B	Solyc05g056040	I2
	SlyARF9C	Solyc08g008380	I2
	SlyARF9D	Solyc08g082630	I2
	SlyETT	Solyc02g077560	II1
	SlyMP	Solyc04g081240	III1
Sphagnum magellanicum	SmaARF10_16A	Sphmag17G056500	IV1
	SmaARF10_16B	Sphmag19G033700	IV1
	SmaARF6_8A	Sphmag04G091800	III5
	SmaARF6_8B	Sphmag06G043400	III5
	SmaARF6_8C	Sphmag10G080900	III5
	SmaARF6_8D	Sphmag11G091800	III5
	SmaARF6_8E	Sphmag15G023400	III5
	SmaETT1	Sphmag01G070900	II4
	SmaETT2	Sphmag02G113100	II4
	SmaETT3	Sphmag05G078500	II4
Taxus baccata	TbaARF10_16A	TBA00014096	IV1
	TbaARF10_16B	TBA00017448	IV1
	TbaARF2A	TBA00002565	I3
	TbaARF2B	TBA00007180	I3
	TbaARF2C	TBA00011366	I3
	TbaARF2D	TBA00021232	I3
	TbaARF6_8A	TBA00003536	III5
	TbaARF6_8B	TBA00007564	III5
	TbaARF6_8C	TBA00021646	III5
	TbaARF7	TBA00002876	III2
	TbaETT	TBA00019312	II3
Thuja plicata	TplARF10_16A	Thupl.29378367s0005	IV1
	TplARF10_16B	Thupl.29381818s0009	IV1
	TplARF2A	Thupl.29377042s0018	I3
	TplARF2B	Thupl.29377438s0003	I3
	TplARF2C	Thupl.29377811s0002	I3
	TplARF2D	Thupl.29382403s0003	I3
	TplARF6_8A	Thupl.29378524s0023	III5
	TplARF6_8B	Thupl.29382025s0003	III5
	TplMP	Thupl.29380749s0009	III1
	TplARF7	Thupl.29381308s0001	III2
	TplETT1	Thupl.29377947s0007	II3
	TplETT2	Thupl.29379795s0010	II3
	TplETT3	Thupl.29381733s0016	II3
	TplETT4	Thupl.29382373s0004	II3
Vitis vinifera	VviARF10	GSVIVG01025198001	IV1
	VviARF16A	GSVIVG01016266001	IV1
	VviARF16B	GSVIVG01025691001	IV1
	VviARF17	GSVIVG01008950001	IV2
	VviARF1A	GSVIVG01023149001	I1
	VviARF1B	GSVIVG01037136001	I1
	VviARF2A	GSVIVG01004942001	I3
	VviARF2B	GSVIVG01008639001	I3
	VviARF2C	GSVIVG01011008001	I3
	VviARF4	GSVIVG01025159001	II2
	VviARF6A	GSVIVG01020805001	III3
	VviARF6B	GSVIVG01021553001	III3
	VviARF7A	GSVIVG01015035001	III2
	VviARF7B	GSVIVG01032251001	III2
	VviARF8	GSVIVG01035204001	III4
	VviARF9A	GSVIVG01019566001	I2
	VviARF9B	GSVIVG01027166001	I2
	VviETT	GSVIVG01021128001	II1
	VviMP	GSVIVG01009865001	III1
Welwitschia mirabilis	WmiARF10_16A	W.mirabilis.06212	IV1
	WmiARF10_16B	W.mirabilis.24527	IV1
	WmiARF2A	W.mirabilis.00589	I3
	WmiARF2B	W.mirabilis.08076	I3
	WmiARF2C	W.mirabilis.08778	I3
	WmiARF2D	W.mirabilis.12910	I3
	WmiARF6_8A	W.mirabilis.06951	III5
	WmiARF6_8B	W.mirabilis.23103	III5
	WmiARF7	W.mirabilis.15539	III2
	WmiMP	W.mirabilis.21901	III1
	WmiETT1	W.mirabilis.02314	II3
	WmiETT2	W.mirabilis.17166	II3
	WmiETT3	W.mirabilis.20017	II3
Zea mays	ZmaARF10_16A	Zm00001d000358	IV1
	ZmaARF10_16B	Zm00001d014013	IV1
	ZmaARF10_16C	Zm00001d014507	IV1
	ZmaARF10_16D	Zm00001d017284	IV1
	ZmaARF10_16E	Zm00001d025871	IV1
	ZmaARF10_16F	Zm00001d032683	IV1
	ZmaARF10_16G	Zm00001d051172	IV1
	ZmaARF10_16H	Zm00001d003011	IV1
	ZmaARF17A	Zm00001d002929	IV2
	ZmaARF17B	Zm00001d026687	IV2
	ZmaARF17C	Zm00001d030801	IV2
	ZmaARF1A	Zm00001d003601	I1
	ZmaARF1B	Zm00001d016838	I1
	ZmaARF1C	Zm00001d050781	I1
	ZmaARF2A	Zm00001d011953	I3
	ZmaARF2B	Zm00001d023659	I3
	ZmaARF2C	Zm00001d041056	I3
	ZmaARF2D	Zm00001d042267	I3
	ZmaARF2E	Zm00001d049295	I3
	ZmaARF6A	Zm00001d014377	III3
	ZmaARF6B	Zm00001d031064	III3
	ZmaARF6C	Zm00001d036593	III3
	ZmaARF6D	Zm00001d041497	III3
	ZmaARF6E	Zm00001d053819	III3
	ZmaARF7A	Zm00001d014690	III2
	ZmaARF7B	Zm00001d015243	III2
	ZmaARF7C	Zm00001d031522	III2
	ZmaARF7D	Zm00001d045026	III2
	ZmaARF8A	Zm00001d001879	III4
	ZmaARF8B	Zm00001d026590	III4
	ZmaARF9	Zm00001d039267	I2
	ZmaETT2	Zm00001d038698	II1
	ZmaETT3	Zm00001d039006	II1
	ZmaETT4	Zm00001d043922	II1
	ZmaETT5	Zm00001d012731	II1
	ZmaETT6	Zm00001d043431	II1
	ZmaMP1	Zm00001d001945	III1
	ZmaMP2	Zm00001d026540	III1
